# Supplementary material for: Impact of walking on life expectancy and lifetime medical expenditure: the Ohsaki Cohort Study
Source: PubMed Central journal article supplement — BMJ Open. 2011 Sep 30;1(2):e000240. doi: 10.1136/bmjopen-2011-000240 (PMC3191604; doi:10.1136/bmjopen-2011-000240), 2011-09-30
Supplement: bmjopen-2011-000240.draft_revisions.pdf [file bmjopen-2011-000240.draft_revisions.pdf]

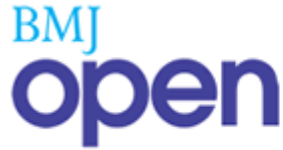

## Impact of Walking on Life Expectancy and Lifetime Medical Expenditure: The Ohsaki Cohort Study

|                                                                                                                                                         |                                                                                                                                                                                                                                                                                                                                                                                                                                                                                                                                                                                                                                                                                                                                                                                                                                                                                                                                                                                                                                                                                                                                                                                     |
|---------------------------------------------------------------------------------------------------------------------------------------------------------|-------------------------------------------------------------------------------------------------------------------------------------------------------------------------------------------------------------------------------------------------------------------------------------------------------------------------------------------------------------------------------------------------------------------------------------------------------------------------------------------------------------------------------------------------------------------------------------------------------------------------------------------------------------------------------------------------------------------------------------------------------------------------------------------------------------------------------------------------------------------------------------------------------------------------------------------------------------------------------------------------------------------------------------------------------------------------------------------------------------------------------------------------------------------------------------|
| Journal:                                                                                                                                                | <i>BMJ Open</i>                                                                                                                                                                                                                                                                                                                                                                                                                                                                                                                                                                                                                                                                                                                                                                                                                                                                                                                                                                                                                                                                                                                                                                     |
| Manuscript ID:                                                                                                                                          | bmjopen-2011-000240                                                                                                                                                                                                                                                                                                                                                                                                                                                                                                                                                                                                                                                                                                                                                                                                                                                                                                                                                                                                                                                                                                                                                                 |
| Article Type:                                                                                                                                           | Research                                                                                                                                                                                                                                                                                                                                                                                                                                                                                                                                                                                                                                                                                                                                                                                                                                                                                                                                                                                                                                                                                                                                                                            |
| Date Submitted by the Author:                                                                                                                           | 28-Jun-2011                                                                                                                                                                                                                                                                                                                                                                                                                                                                                                                                                                                                                                                                                                                                                                                                                                                                                                                                                                                                                                                                                                                                                                         |
| Complete List of Authors:                                                                                                                               | Nagai, Masato; Tohoku University Graduate School of Medicine, Division of Epidemiology, Department of Public Health and Forensic Medicine<br>Kuriyama, Shinichi; Tohoku University Graduate School of Medicine, Department of Molecular Epidemiology, Environment and Genome Research Center<br>Kakizaki, Masako; Tohoku University Graduate School of Medicine, Division of Epidemiology, Department of Public Health and Forensic Medicine<br>Ohmori-Matsuda, Kaori; Tohoku University Graduate School of Medicine, Division of Epidemiology, Department of Public Health and Forensic Medicine<br>Sone, Toshimasa; Tohoku University Graduate School of Medicine, Division of Epidemiology, Department of Public Health and Forensic Medicine<br>Hozawa, Atsushi; Yamagata University Graduate School of Medical Science, Department of Public Health<br>Kawado, Miyuki; Fujita Health University School of Medicine, Department of Hygiene<br>Hashimoto, Shuji; Fujita Health University School of Medicine, Department of Hygiene<br>Tsuji, Ichiro; Tohoku University Graduate School of Medicine, Division of Epidemiology, Department of Public Health and Forensic Medicine |
| <b>Primary Subject Heading</b>:                                                                                                                         | Epidemiology                                                                                                                                                                                                                                                                                                                                                                                                                                                                                                                                                                                                                                                                                                                                                                                                                                                                                                                                                                                                                                                                                                                                                                        |
| Keywords:                                                                                                                                               | walking, lifetime medical expenditure, life expectancy, physical activity                                                                                                                                                                                                                                                                                                                                                                                                                                                                                                                                                                                                                                                                                                                                                                                                                                                                                                                                                                                                                                                                                                           |
| Note: The following files were submitted by the author for peer review, but cannot be converted to PDF. You must view these files (e.g. movies) online. |                                                                                                                                                                                                                                                                                                                                                                                                                                                                                                                                                                                                                                                                                                                                                                                                                                                                                                                                                                                                                                                                                                                                                                                     |
| Figure1-a BMJ open.xls<br>Figure1-b BMJ open.xls                                                                                                        |                                                                                                                                                                                                                                                                                                                                                                                                                                                                                                                                                                                                                                                                                                                                                                                                                                                                                                                                                                                                                                                                                                                                                                                     |

1  
2  
3  
4  
5  
6  
7  
8  
9  
10  
11  
12  
13  
14  
15  
16  
17  
18  
19  
20  
21  
22  
23  
24  
25  
26  
27  
28  
29  
30  
31  
32  
33  
34  
35  
36  
37  
38  
39  
40  
41  
42  
43  
44  
45  
46  
47  
48  
49  
50  
51  
52  
53  
54  
55  
56  
57  
58  
59  
60

SCHOLARONE™  
Manuscripts

For peer review only

## Research

### **Impact of Walking on Life Expectancy and Lifetime Medical Expenditure: The Ohsaki Cohort Study**

Running Title: Walking and Life Expectancy and Lifetime Medical Cost

Masato Nagai, MSc<sup>1</sup>, Shinichi Kuriyama, MD, PhD<sup>1,2</sup>, Masako Kakizaki, PhD<sup>1</sup>, Kaori Ohmori-Matsuda, MD, PhD<sup>1</sup>, Toshimasa Sone, MSc<sup>1</sup>, Atsushi Hozawa, MD, PhD<sup>1,3</sup>, Miyuki Kawado, PhD<sup>4</sup>, Shuji Hashimoto, PhD<sup>4</sup>, and Ichiro Tsuji, MD, PhD<sup>1</sup>

<sup>1</sup> Division of Epidemiology, Department of Public Health and Forensic Medicine, Tohoku University Graduate School of Medicine, Sendai, Japan

<sup>2</sup> Department of Molecular Epidemiology, Environment and Genome Research Center, Tohoku University Graduate School of Medicine, Sendai, Japan

<sup>3</sup> Department of Public Health, Yamagata University Graduate School of Medical Science, Yamagata, Japan

<sup>4</sup> Department of Hygiene, Fujita Health University School of Medicine, Toyoake, Japan

1  
2  
3  
4  
5  
6  
7 Address for correspondence:  
8

9 Masato Nagai, MSc.

10  
11 Division of Epidemiology, Department of Public Health and Forensic Medicine, Tohoku

12  
13 University Graduate School of Medicine, Sendai, Japan

14  
15  
16  
17 2-1 Seiryō-machi, Aoba-ku, Sendai, Miyagi, 980-8575, Japan

18  
19  
20 Phone: +81-22-717-8123

21  
22  
23 Fax: +81-22-717-8125

24  
25  
26 E-mail: [m-nagai@med.tohoku.ac.jp](mailto:m-nagai@med.tohoku.ac.jp)  
27  
28  
29  
30  
31

32 Manuscript information:  
33

34  
35 #Word counts: 2,819

36  
37 #References: 40

38  
39 #Tables: 3

40  
41 #Figures: 2

42  
43  
44 #Page: 32  
45  
46  
47  
48  
49  
50  
51  
52  
53  
54  
55  
56  
57  
58  
59  
60

## Abstract

### Objective

People who spend a longer time walking have lower demands for medical care.

However, in view of their longer life expectancy, it is unclear whether their lifetime medical expenditure increases or decreases. The present study examined the association between time spent walking, life expectancy, and lifetime medical expenditure.

### Method

We followed up 27,738 participants aged 40-79 years and prospectively collected data on their medical expenditure and survival covering a 13-year period. Participants were classified into those walking  $<1$  and  $\geq 1$  hour per day. We constructed life tables, and estimated the life expectancy and lifetime medical expenditure from 40 years of age using estimate of multiaadjusted mortality and medical expenditure by Poisson regression model and linear regression model, respectively.

### Results

In spite of their longer life expectancy, participants who walked  $\geq 1$  hour per day required lower lifetime medical expenditure than participants who walked  $<1$  hour per day. In men, multiaadjusted life expectancy for those who walked  $\geq 1$  hour per day was 44.81 years, which was significantly longer by 1.38 years than that for those who walked  $<1$  hour per day ( $p=0.0073$ ). Multiaadjusted lifetime medical expenditure for

1  
2  
3  
4  
5  
6 those who walked  $\geq 1$  hour per day was £99,423.6, being significantly lower by 7.6%  
7  
8  
9 ( $p=0.0048$ ). In women, multiadjusted life expectancy for those who walked  $\geq 1$  hour  
10  
11 per day was 57.78 years, which was 1.16 years longer ( $p=0.2351$ ), and multiadjusted  
12  
13 lifetime medical expenditure was £128,161.2, being 2.7% lower ( $p=0.2559$ ).  
14  
15  
16

## 17 **Discussion**

18  
19  
20 Increased longevity resulting from a healthier lifestyle does not necessarily translate  
21  
22 into an increased amount of medical expenditure throughout life. Encouraging people  
23  
24 to walk may extend life expectancy and decrease lifetime medical expenditure.  
25  
26  
27  
28  
29  
30  
31

32 (268 words)  
33  
34  
35  
36  
37  
38  
39

## 40 **Key Words:**

41  
42 walking; lifetime medical expenditure; life expectancy; physical activity;  
43  
44  
45  
46  
47  
48  
49  
50  
51  
52  
53  
54  
55  
56  
57  
58  
59  
60

## INTRODUCTION

Previous studies have agreed that a higher level of physical activity extends life expectancy.<sup>1-4</sup> Walking is part of a physically active lifestyle. Previous studies have indicated that a longer time spent walking,<sup>5-13</sup> walking pace,<sup>8, 14-16</sup> and a longer distance walked<sup>17, 18</sup> are significantly associated with a decreased risk of mortality.

We previously reported that medical expenditure per month was significantly reduced among those who spent a longer time walking, based on the same cohort dataset as that used here.<sup>19</sup> Similar findings have been reported worldwide.<sup>20, 21</sup> However, in view of the increased life expectancy of those who walk for a longer time, it is unclear whether lifetime medical expenditure increases or decreases as a result. In other words, the question to be answered here is whether a lifelong healthy lifestyle eventually increases lifetime medical expenditure because of extended life expectancy.

So far, only one study has examined the association between physical activity and lifetime costs.<sup>4</sup> This revealed that people with a high physical activity level tended to live longer than people with a lower physical activity level, and that the former had lower lifetime medical costs than the latter. However, that study was only a simulation analysis based on assumed variations in the health and economic effects of active and sedentary lifestyles.

The objective of the present study was to examine the association between walking, life expectancy, and lifetime medical expenditure using actual individual data derived

1  
2  
3  
4  
5  
6  
7 from a population-based 13-year prospective observation period. The population  
8  
9 comprised 27,738 Japanese adults aged 40-79 years living in the community who were  
10  
11 free of any functional limitations or chronic conditions interfering with physical  
12  
13 activity, with an accrued total of 285,342 person-years. This cohort study has been  
14  
15 monitoring survival and medical care utilization, and its costs, for all participants.<sup>19, 22,</sup>  
16  
17  
18  
19  
20  
21 <sup>23</sup> Using this dataset, we constructed a life table to estimate life expectancy and  
22  
23 lifetime medical expenditure according to the time spent walking.<sup>23-25</sup>  
24  
25  
26  
27  
28  
29  
30  
31  
32  
33  
34  
35  
36  
37  
38  
39  
40  
41  
42  
43  
44  
45  
46  
47  
48  
49  
50  
51  
52  
53  
54  
55  
56  
57  
58  
59  
60



## MATERIALS AND METHODS

### Study cohort

The present data were derived from the Ohsaki National Health Insurance (NHI) Cohort Study.<sup>19, 22, 23, 26</sup> We conducted a self-administered questionnaire survey of various lifestyle habits between October and December 1994 for all NHI beneficiaries aged 40 to 79 years who lived in the catchment area of Ohsaki Public Health Center, Miyagi Prefecture, northeastern Japan. Out of 54,996 eligible individuals, 52,029 (95%) responded.

We excluded 776 participants who had withdrawn from the NHI before January 1, 1995 because their cost data were not available. Thus, the remaining 51,253 participants formed the study cohort. The study protocol was approved by the Ethics Committee of Tohoku University School of Medicine. Participants who had returned the self-administered questionnaires and signed them were considered to have consented to participate.

For the present analysis, we excluded participants who had functional limitation or chronic conditions interfering with physical activity. Physical function status was assessed using the 6-item measure of the Medical Outcomes Study (MOS) Short-form General Health Survey.<sup>27</sup> Participants were excluded if they stated on the MOS questionnaire that they were unable to perform moderate or vigorous activities

1  
2  
3  
4  
5  
6  
7 (n=15,916). We excluded participants who reported severe bodily pain (n=949), or  
8  
9 history of stroke (n=474), myocardial infarction (n=585) or arthritis (n=2,176). We  
10  
11 also excluded those who died within the first year (n=174) or did not provide complete  
12  
13 responses in the walking status questionnaire (n=3,241). Thus, a total of 27,738  
14  
15 participants (15,521 men and 12,217 women) remained. These participants were  
16  
17 apparently healthy enough to walk for as long as they wished.  
18  
19  
20  
21  
22  
23  
24  
25

### 26 **Time spent walking**

27  
28 The self-administered questionnaire included items on time spent walking. We  
29  
30 divided the participants into two groups according to the time spent walking daily: <1  
31  
32 hour and  $\geq 1$  hour. We had previously evaluated and reported the validity of  
33  
34 self-reported time spent walking.<sup>5, 19, 28</sup> This validation study had indicated that  
35  
36 self-reported walking time was reasonably reproducible and sufficiently valid for  
37  
38 studying the health effects of walking.  
39  
40  
41  
42  
43  
44  
45  
46  
47  
48  
49

### 50 **Health insurance system in Japan**

51  
52 Details of the Japanese NHI system have been described previously.<sup>22, 23, 29, 30</sup> Briefly,  
53  
54 everyone living in Japan is required to enroll in a health insurance system. The NHI  
55  
56 covers 35% of the Japanese population, mainly farmers, self employed, or retired people.  
57  
58 The NHI covers almost all medical treatment, including diagnostic tests, medication,  
59  
60

1  
2  
3  
4  
5  
6  
7 surgery, supplies and materials, physicians and other personnel costs, inpatient care, and  
8  
9 most dental treatment. It covers treatment by physicians and nurses but not that by  
10  
11 other professionals such as home health aides. Payment to medical providers is made  
12  
13 on a fee-for-service basis, where the price of each service is determined by a uniform  
14  
15 national fee schedule.  
16  
17  
18

19  
20 When a participant withdraws from the NHI system because of death, emigration, or  
21  
22 employment, the withdrawal date and its reason are coded in the NHI withdrawal  
23  
24 history files. We recorded any mortality or migration by reviewing the NHI  
25  
26 withdrawal history files and collected data on the death of participants by reviewing the  
27  
28 death certificates filed at Ohsaki Public Health Center. We thus followed up the  
29  
30 participants and prospectively collected data on medical care utilization and its costs for  
31  
32 all individuals in the cohort from January 1 1995 through December 31 2007.  
33  
34  
35  
36  
37  
38  
39  
40  
41  
42

### 43 **Statistical analysis**

44  
45 Using the Ohsaki NHI cohort database, we estimated mortality and medical expenditure  
46  
47 for individual age-groups, and for the categories of time spent walking, for both men  
48  
49 and women. We divided age in to the following groups: 40-44, 45-49, 50-54, 55-59,  
50  
51 60-64, 65-69, 70-74, 75-79, 80-84, and  $\geq 85$  years. The multiadjusted mortality rates  
52  
53 for each age category were estimated from a Poisson regression model based on  
54  
55 person-years and the number of deaths from 1996 until 2007. The dependent variable  
56  
57  
58  
59  
60

1  
2  
3  
4  
5  
6 was mortality and independent variables were age-groups, categories of time spent  
7  
8 walking, and the following covariates: smoking status (current and past smoker, or  
9  
10 never smoker), alcohol consumption (current drinker consuming 1-499 g/week, current  
11  
12 drinker consuming  $\geq 450$  g/week, or never and past drinker), body mass index (BMI:  
13  
14  $< 21$  kg/m<sup>2</sup>, 21-24.9 kg/m<sup>2</sup>, or  $\geq 25$  kg/m<sup>2</sup>), self-rated health (good or not good), sports  
15  
16 and physical activity ( $\geq 3$  hours/week or  $< 3$  hours/week), history of hypertension  
17  
18 (presence or absence), history of diabetes mellitus (presence or absence), history of  
19  
20 cancer (presence or absence), history of liver disease (presence or absence), and history  
21  
22 of kidney disease (presence or absence).<sup>19</sup> We estimated the mortality of participants  
23  
24 aged  $\geq 85$  years by multiplying the estimated mortality for the 85-89 year age-group by  
25  
26 the ratio of mortality for the same age-group relative to the mortality for  $\geq 85$  years from  
27  
28 complete life tables for the year 2000, as there were few person-years for participants  
29  
30 aged over 90 years in our dataset.<sup>31</sup>

31  
32  
33 Because medical expenditure increases before death, we separately calculated  
34  
35 medical expenditure for participants who survived through the index year and for those  
36  
37 who died. The multiadjusted medical expenditure per year for survivors and decedents,  
38  
39 respectively, was estimated for each of the age-groups and the categories of time spent  
40  
41 walking using a linear regression model adjusted for the above covariates.  
42  
43

44  
45 The estimates of multiadjusted mortality and medical expenditure for each age-group  
46  
47 were used for estimating life expectancy and lifetime medical expenditure from 40 years  
48  
49  
50  
51  
52  
53  
54  
55  
56  
57  
58  
59  
60

of age. Life expectancy was calculated using Chiang's analytical method on the basis of the latest published complete life tables of Japan for the year 2000.<sup>23, 24, 31</sup> Lifetime medical expenditure was estimated from the sum obtained by multiplying the static population in life table by the medical expenditure for survivors and the number of deaths in the life table by the increased medical expenditure due to death, which was calculated by subtracting the medical expenditure in year of survivors from that in the period of 1 year before death. That is, life expectancy ( $e_x$ ) and lifetime medical expenditure ( $M_x$ ) for each age-groups (x) were estimated using the numbers of survivors ( $l_x$ ), deaths ( $d_x$ ), static population ( $L_x$ ), multiadjusted medical expenditure for survivors ( $a_y$ ), and multiadjusted medical expenditure for the deceased ( $b_y$ ) as follows;

$\sum_{y \geq x} L_y$  is sum of  $y \geq x$

$$e_x = \frac{\sum L_y}{l_x}$$

$$M_x = \frac{\sum(L_y \cdot a_y + d_y \cdot b_y)}{l_x}$$

The 95% confidence intervals (CIs) were estimated using a Monte Carlo simulation based on a Poisson regression model and linear regression model. We repeated 100,000 times and all analysis were used the SAS version 9.1 statistical software package (SAS Institute Inc., 2004).

We used a purchasing power parity rate of UK£ 1.00=JPN¥ 140.

## RESULTS

After 13 years of follow-up, we observed 2,936 deaths (2,193 men and 743 women) among the 27,738 participants (15,521 men and 12,217 women). Mean medical expenditure per year for survivors who walked  $\geq 1$  hour per day was £1,714.2 in men and £1,621.4 in women, being significantly lower than for those who walked  $< 1$  hour per day (men; £2,064.3,  $p < 0.0001$ , women; £1,878.6,  $p < 0.0001$ ). Also, mean medical expenditure in the year of death for participants who walked  $\geq 1$  hour per day was £16,878.6 in men and £17,464.3 in women, which was not significantly different from those who walked  $< 1$  hour per day (men; £16,650.0,  $p = 0.7315$ , women; £17,742.9,  $p = 0.8330$ ).

### Baseline characteristics in terms of categories for time spent walking

Table 1 shows the baseline characteristics of the study participants according to the categories of time spent walking for men and women, respectively.

As compared with those who walked  $< 1$  hour per day, participants who walked  $\geq 1$  hour per day were less likely to be smokers and obese. Self-reported history of hypertension, diabetes mellitus, and liver disease were all significantly less prevalent in those who walked  $\geq 1$  hour per day.

### **Mortality in terms of categories for time spent walking**

Figure 1-a for men and Figure 1-b for women show the multiadjusted mortality (per 1,000) in each of the age-groups according to the categories of time spent walking.

In men in each age-group, multiadjusted mortality was lower in participants who walked  $\geq 1$  hour per day than in those who walked  $< 1$  hour per day. In women in all age-groups except for the aged 40-44 and 45-49 year groups, multiadjusted mortality was lower in participants who walked  $\geq 1$  hour per day than in those who walked  $< 1$  hour per day.

Table 2 shows the mortality ratio with 95% CIs according to the categories of time spent walking. In men, the multiadjusted mortality ratio for participants who walked  $\geq 1$  hour per day was significantly lower than that for participants who walked  $< 1$  hour per day (0.90, 95% CIs; 0.82-0.98,  $p=0.0153$ ). In women, the multiadjusted mortality ratio for participants who walked  $\geq 1$  hour per day was non-significantly lower than that for participants who walked  $< 1$  hour per day (0.95, 95% CIs; 0.82-1.10,  $p=0.4693$ ).

### **Life expectancy and lifetime medical expenditure in terms of time spent walking**

Table 3 shows life expectancy and lifetime medical expenditure with 95% CIs according to the categories of time spent walking.

1  
2  
3  
4  
5  
6  
7  
8  
9  
10  
11  
12  
13  
14  
15  
16  
17  
18  
19  
20  
21  
22  
23  
24  
25  
26  
27  
28  
29  
30  
31  
32  
33  
34  
35  
36  
37  
38  
39  
40  
41  
42  
43  
44  
45  
46  
47  
48  
49  
50  
51  
52  
53  
54  
55  
56  
57  
58  
59  
60

As compared with those who walked <1 hour per day, men who walked  $\geq 1$  hour per day lived significantly longer, but their lifetime medical expenditure was significantly lower. The same results were observed for women, although the differences did not reach statistical significance.

In men, the multiadjusted life expectancy of those who walked  $\geq 1$  hour per day was 44.81 years (95% CI; 43.66-45.94), which was significantly longer by 1.38 years ( $p=0.0073$ ) than for those who walked <1 hour per day (43.43 years; 95% CI; 42.39-44.41). The multiadjusted lifetime medical expenditure for participants who walked  $\geq 1$  hour per day was £99,423.6 (95% CI; 92,515.9-106,694.7), being significantly lower by 7.6% ( $p=0.0048$ ) than for those who walked <1 hour per day (£107,544.2; 95% CI; 101,234.0-114,044.6).

In women, the multiadjusted life expectancy for participants who walked  $\geq 1$  hour per day was 57.78 years (95% CI; 54.02-62.22), which was non-significantly longer by 1.16 years ( $p=0.2351$ ) than for those who walked <1 hour per day (56.62 years; 95% CI; 53.17-60.62). The multiadjusted lifetime medical expenditure for participants who walked  $\geq 1$  hour per day was £128,161.2 (95% CI; 111,335.0-148,494.7), being non-significantly lower by 2.7% ( $p=0.2559$ ) than for those who walked <1 hour per day (£131,766.8; 95% CI; 115,902.4-150,714.3).



## DISCUSSION

The present results indicate that multiadjusted lifetime medical expenditure from the age of 40 years for those who walked  $\geq 1$  hour per day was lower by 7.6% in men and by 2.7% in women than for those who walked  $< 1$  hour per day. This decrease in lifetime medical expenditure was observed in spite of longer life expectancy (1.38 years for men and 1.16 years for women) among those who walked  $\geq 1$  hour per day. Thus, a healthy lifestyle not only extended longevity, but also decreased the amount of lifetime medical expenditure.

### Comparison with other studies

Four studies have addressed the association between physical activity level and life expectancy.<sup>1-4</sup> Additionally, studies investigating associations between time spent walking,<sup>5-13</sup> or distance walked<sup>17, 18</sup> and mortality have consistently shown that participants who have higher physical activity have longer life expectancy and lower mortality than participants who have lower physical activity. Only one study has reported the association between physical activity and lifetime medical expenditure.<sup>4</sup> In a simulation study, Keeler et al. demonstrated that if participants with a sedentary life style had exercised regularly, the additional exercise would have increased their life

1  
2  
3  
4  
5  
6  
7 expectancy by 300 days and saved £1,900 in lifetime costs. Even though there is a  
8  
9 difference between physical activity and walking, this result is consistent with the  
10  
11 present finding that participants who walked  $\geq 1$  hour per day lived longer and had lower  
12  
13 lifetime medical expenditure.  
14  
15

16  
17 We previously calculated life expectancy and lifetime medical expenditure in  
18  
19 relation to smoking and BMI from age 40 years using the same dataset as that for the  
20  
21 present study.<sup>23, 25</sup> The results indicated that lifetime medical expenditure was lower  
22  
23 for smokers than for non-smokers, reflecting the 3.5-year shorter life expectancy of  
24  
25 smokers.<sup>25</sup> On the other hand, lifetime medical expenditure was higher for  
26  
27 participants who were obese ( $BMI \geq 30.0$ ) than for those who had normal weight  
28  
29 ( $18.5 \leq BMI < 25.0$ ), even though the former lived 2.0 years less than the latter.<sup>23</sup> In fact,  
30  
31 both smokers and obese participants had shorter life expectancy than non-smokers and  
32  
33 normal-weight participants, whereas their lifetime medical expenditure was conversely  
34  
35 increased. These differences could be explained by the impact of these risk factors on  
36  
37 quality of life. Using prospective data for 16,176 adult Caucasians in the USA,<sup>32</sup>  
38  
39 Reuser et al. estimated life expectancy and years of life with and without activities of  
40  
41 daily living (ADL) disability in relation to smoking and BMI, respectively. The results  
42  
43 indicated that smoking decreased both life expectancy and years of life with ADL  
44  
45 disability, whereas obesity decreased the former but increased the latter, leading to their  
46  
47 conclusion that “smoking kills, and obesity disables”. Reuser’s conclusion is  
48  
49  
50  
51  
52  
53  
54  
55  
56  
57  
58  
59  
60

1  
2  
3  
4  
5  
6  
7 concordant with the impact of walking on life expectancy and lifetime medical  
8  
9 expenditure. Physical activity decreases not only mortality but also disability,<sup>5-13, 17, 18,</sup>  
10  
11 <sup>33</sup> leading to lower medical expenditure.<sup>34</sup> For instance, walking has been  
12  
13 significantly associated with a lower risk of cardiovascular disease,<sup>7</sup> stroke,<sup>35</sup> coronary  
14  
15 heart disease,<sup>36, 37</sup> type 2 diabetes,<sup>38</sup> and hypertension.<sup>39</sup> Consequently, walking also  
16  
17 reduces expenditure on medication needed for these conditions.<sup>40</sup>  
18  
19  
20  
21  
22  
23  
24  
25

### 26 **Strengths and limitations**

27  
28  
29 This is the first study to have investigated the association between walking, life  
30  
31 expectancy, and lifetime medical expenditure. A major strength of this study was that  
32  
33 we collected individual data on medical expenditure based on a cohort study of survival  
34  
35 and medical care utilization, and its cost, for all participants,<sup>19, 22, 23, 25, 29</sup> and the NHI  
36  
37 covers almost all medical treatment in Japan. Second, we conducted a 13-year  
38  
39 prospective observation of 27,738 Japanese adults aged 40-79 years living in the  
40  
41 community who were free of any functional limitations or chronic conditions interfering  
42  
43 with physical activity, with an accrued total of 285,342 person-years. Third, in order  
44  
45 to reduce bias or reverse causation in that people did not walk because of functional  
46  
47 limitations that also required medical expenditure, we excluded participants who, at the  
48  
49 baseline, reported limited physical function or conditions interfering with physical  
50  
51 activity. Additionally, to control for confounders, we also included various covariates  
52  
53  
54  
55  
56  
57  
58  
59  
60

1  
2  
3  
4  
5  
6  
7 in our Poisson regression model and linear regression model.  
8

9 On the other hand, several limitations should also be considered. First, we  
10 assessed walking using a simple questionnaire in which we asked the participants to  
11 report only the time spent walking and did not ask about walking pace, distance walked,  
12 or any distinction between walking for exercise and other reasons. Second, longer  
13 time spent walking may be a reflection of performing more vigorous activity, making it  
14 difficult to distinguish the impact of walking from other types of physical activity.  
15 However, the present result did not change after multivariate adjustment.  
16  
17  
18  
19  
20  
21  
22  
23  
24  
25  
26  
27  
28  
29  
30  
31

### 32 **Conclusions and policy implication**

33 In summary, lifetime medical expenditure was shown to be decreased in participants  
34 who walked  $\geq 1$  hour per day, despite the fact that they lived longer. Increased  
35 longevity resulting from a healthier lifestyle did not necessarily translate into an  
36 increased amount of medical expenditure throughout life. Intervention aimed at  
37 encouraging people to walk may extend life expectancy without apparently increasing  
38 lifetime medical expenditure.  
39  
40  
41  
42  
43  
44  
45  
46  
47  
48  
49  
50  
51  
52  
53  
54  
55  
56  
57  
58  
59  
60

## Article focus

- Medical expenditure per month was reduced when time spent walking was increased.
- Walking is associated with a decreased risk of mortality.
- In view of the increased life expectancy of those who walk longer, it is unclear whether lifetime medical expenditure increases or decreases as a result.

## Key messages

- Lifetime medical expenditure from the age of 40 years for men and women who walked  $\geq 1$  hour per day was reduced by 7.6% and 2.7%, respectively, in comparison with those who walked  $< 1$  hour per day.
- Years of life added as a result of a healthy lifestyle did not necessarily translate into an increased amount of lifetime medical expenditure.

## Strengths and limitations of this study

- This is the first study to have investigated the association between walking, life expectancy, and lifetime medical expenditure.
- We assessed walking using a simple questionnaire in which we asked the participants to report only the time spent walking and did not ask about walking pace, distance

1  
2  
3  
4  
5  
6  
7 walked, or any distinction between walking for exercise and other reasons.  
8  
9

## 10 11 12 **Contributions**

13  
14 All authors contributed to the design of the study. Masato Nagai, Shinichi Kuriyama,  
15  
16 Masako Kakizaki, Kaori Ohmori-Matsuda, Toshimasa Sone, and Ichiro Tsuji  
17  
18 participated in data collection. Masato Nagai, Shinichi Kuriyama, Atsushi Hozawa,  
19  
20  
21 Miyuki Kawado and Shuji Hashimoto participated in data analysis. Masato Nagai,  
22  
23  
24 Masako Kakizaki, Kaori Ohmori-Matsuda, Toshimasa Sone, Atsushi Hozawa, Miyuki  
25  
26  
27 Kawad, and Shuji Hashimoto participated in the writing of the report. Shinichi  
28  
29  
30 Kuriyama and Ichiro Tsuji participated in critical revision of the manuscript. All  
31  
32  
33 authors approved the final version of the report for submission.  
34  
35  
36  
37  
38  
39

## 40 41 **Funding**

42  
43 This study was supported by a Health Sciences Research Grant for Health Services  
44  
45 (H21-Choju-Ippan-001, H20-Junkankitou (Seisyu)-Ippan-013, H22- Junkankitou  
46  
47 (Seisyu)-Ippan-012, H23- Junkankitou (Seisyu)-Ippan-005), Ministry of Health, Labour  
48  
49  
50 and Welfare, Japan. Masato Nagai is a recipient of a Research Fellowships of the  
51  
52  
53 Japan Society for the Promotion of Science for Young Scientists.  
54  
55  
56  
57  
58  
59

## 60 **Conflicts of Interest**

1  
2  
3  
4  
5  
6  
7 The authors declare that they have no conflicts of interest.  
8  
9

### 10 11 12 **Ethical approval** 13

14  
15 The study protocol was approved by the Ethics Committee of Tohoku University  
16  
17 School of Medicine. Participants who had returned the self-administered  
18  
19 questionnaires and signed them were considered to have consented to participate.  
20  
21  
22  
23  
24  
25

### 26 27 **Data sharing** 28

29 No additional data available.  
30  
31  
32  
33

### 34 35 **Exclusive licence** 36

37 The Corresponding Author has the right to grant on behalf of all authors and does grant  
38  
39 on behalf of all authors, an exclusive licence (or non exclusive for government  
40  
41 employees) on a worldwide basis to the BMJ Publishing Group Ltd and its Licensees to  
42  
43 permit this article (if accepted) to be published in BMJ editions and any other BMJ PGL  
44  
45 products and sublicences to exploit all subsidiary rights, as set out in our licence.  
46  
47  
48  
49  
50  
51  
52

### 53 54 **Figure legend** 55

56  
57 Figure 1  
58

59  
60 Multiadjusted mortality by the categories of time spent walking in each age-groups in

men (a) and women (b).

## References

1. Franco OH, de Laet C, Peeters A, Jonker J, Mackenbach J, Nusselder W. Effects of physical activity on life expectancy with cardiovascular disease. *Arch Intern Med* 2005; 165: 2355-2360.
2. Hatziandreu EI, Koplan JP, Weinstein MC, Caspersen CJ, Warner KE. A cost-effectiveness analysis of exercise as a health promotion activity. *Am J Public Health* 1988; 78: 1417-1421.
3. Jonker JT, De Laet C, Franco OH, Peeters A, Mackenbach J, Nusselder WJ. Physical activity and life expectancy with and without diabetes: life table analysis of the Framingham Heart Study. *Diabetes Care* 2006; 29: 38-43.
4. Keeler EB, Manning WG, Newhouse JP, Sloss EM, Wasserman J. The external costs of a sedentary life-style. *Am J Public Health* 1989; 79: 975-981.
5. Fujita K, Takahashi H, Miura C, et al. Walking and mortality in Japan: the Miyagi Cohort Study. *J Epidemiol* 2004; 14: S26-32.
6. Kujala UM, Kaprio J, Sarna S, Koskenvuo M. Relationship of leisure-time physical activity and mortality: the Finnish twin cohort. *JAMA* 1998; 279: 440-444.
7. LaCroix AZ, Leveille SG, Hecht JA, Grothaus LC, Wagner EH. Does walking



- 1  
2  
3  
4  
5  
6  
7 decrease the risk of cardiovascular disease hospitalizations and death in older  
8  
9 adults? *J Am Geriatr Soc* 1996; 44: 113-120.
- 10  
11  
12 8. Lee IM, Rexrode KM, Cook NR, Manson JE, Buring JE. Physical activity and  
13  
14 coronary heart disease in women: is "no pain, no gain" passe? *JAMA* 2001; 285:  
15  
16 1447-1454.
- 17  
18  
19 9. Morioka S. A cohort study on the relationship between lifestyles and total  
20  
21 mortality. *Nippon Koshu Eisei Zasshi* 1996; 43: 469-478.
- 22  
23  
24  
25  
26 10. Seki N. Relationships between walking hours, sleeping hours, meaningfulness of  
27  
28 life (ikigai) and mortality in the elderly: prospective cohort study. *Nippon*  
29  
30 *Eiseigaku Zasshi* 2001; 56: 535-540.
- 31  
32  
33  
34  
35 11. Stessman J, Maaravi Y, Hammerman-Rozenberg R, Cohen A. The effects of  
36  
37 physical activity on mortality in the Jerusalem 70-Year-Olds Longitudinal Study.  
38  
39 *J Am Geriatr Soc* 2000; 48: 499-504.
- 40  
41  
42  
43 12. Wannamethee SG, Shaper AG, Walker M. Physical activity and mortality in older  
44  
45 men with diagnosed coronary heart disease. *Circulation* 2000; 102: 1358-1363.
- 46  
47  
48  
49 13. Weller I, Corey P. The impact of excluding non-leisure energy expenditure on  
50  
51 the relation between physical activity and mortality in women. *Epidemiology*  
52  
53 1998; 9: 632-635.
- 54  
55  
56  
57 14. Dumurgier J, Elbaz A, Ducimetiere P, Tavernier B, Alperovitch A, Tzourio C.  
58  
59 Slow walking speed and cardiovascular death in well functioning older adults:  
60

- 1  
2  
3  
4  
5  
6  
7 prospective cohort study. *BMJ* 2009; 339: b4460.  
8  
9  
10 **15.** Tanasescu M, Leitzmann MF, Rimm EB, Willett WC, Stampfer MJ, Hu FB.  
11  
12 Exercise type and intensity in relation to coronary heart disease in men. *JAMA*  
13  
14 2002; 288: 1994-2000.  
15  
16  
17 **16.** Cooper R, Kuh D, Hardy R. Objectively measured physical capability levels and  
18  
19 mortality: systematic review and meta-analysis. *BMJ* 2010; 341: c4467.  
20  
21  
22  
23 **17.** Hakim AA, Petrovitch H, Burchfiel CM, et al. Effects of walking on mortality  
24  
25 among nonsmoking retired men. *N Engl J Med* 1998; 338: 94-99.  
26  
27  
28  
29 **18.** Lee IM, Paffenbarger RS, Jr. Associations of light, moderate, and vigorous  
30  
31 intensity physical activity with longevity. The Harvard Alumni Health Study. *Am*  
32  
33 *J Epidemiol* 2000; 151: 293-299.  
34  
35  
36  
37 **19.** Tsuji I, Takahashi K, Nishino Y, et al. Impact of walking upon medical care  
38  
39 expenditure in Japan: the Ohsaki Cohort Study. *Int J Epidemiol* 2003; 32:  
40  
41 809-814.  
42  
43  
44  
45  
46 **20.** Jones TF, Eaton CB. Cost-benefit analysis of walking to prevent coronary heart  
47  
48 disease. *Arch Fam Med* 1994; 3: 703-710.  
49  
50  
51  
52 **21.** Perkins AJ, Clark DO. Assessing the association of walking with health services  
53  
54 use and costs among socioeconomically disadvantaged older adults. *Prev Med*  
55  
56 2001; 32: 492-501.  
57  
58  
59  
60 **22.** Tsuji I, Nishino Y, Ohkubo T, et al. A prospective cohort study on National

- 1  
2  
3  
4  
5  
6  
7 Health Insurance beneficiaries in Ohsaki, Miyagi Prefecture, Japan: study design,  
8  
9 profiles of the subjects and medical cost during the first year. *J Epidemiol* 1998;  
10  
11 8: 258-263.  
12  
13  
14  
15 **23.** Nagai M, Kuriyama S, Kakizaki M, et al. Impact of Obesity, Overweight and  
16  
17 Underweight on Life Expectancy and Lifetime Medical Expenditures. *Popul*  
18  
19 *Health Metr.* under review.  
20  
21  
22  
23 **24.** Chiang CL. *The Life Table and Its Applications*: Krieger Publishing Company  
24  
25  
26 1983.  
27  
28  
29 **25.** Hayashida K, Imanaka Y, Murakami G, et al. Difference in lifetime medical  
30  
31 expenditures between male smokers and non-smokers. *Health Policy* 2010; 94:  
32  
33 84-89.  
34  
35  
36  
37 **26.** Kuriyama S, Shimazu T, Ohmori K, et al. Green tea consumption and mortality  
38  
39 due to cardiovascular disease, cancer, and all causes in Japan: the Ohsaki study.  
40  
41 *JAMA* 2006; 296: 1255-1265.  
42  
43  
44  
45  
46 **27.** Stewart AL, Hays RD, Ware JE, Jr. The MOS short-form general health survey.  
47  
48 Reliability and validity in a patient population. *Med Care* 1988; 26: 724-735.  
49  
50  
51  
52 **28.** Tsubono Y, Tsuji I, Fujita K, et al. Validation of walking questionnaire for  
53  
54 population-based prospective studies in Japan: comparison with pedometer. *J*  
55  
56 *Epidemiol* 2002; 12: 305-309.  
57  
58  
59  
60 **29.** Kuriyama S, Tsuji I, Ohkubo T, et al. Medical care expenditure associated with

- 1  
2  
3  
4  
5  
6  
7  
8  
9  
10  
11  
12  
13  
14  
15  
16  
17  
18  
19  
20  
21  
22  
23  
24  
25  
26  
27  
28  
29  
30  
31  
32  
33  
34  
35  
36  
37  
38  
39  
40  
41  
42  
43  
44  
45  
46  
47  
48  
49  
50  
51  
52  
53  
54  
55  
56  
57  
58  
59  
60
- body mass index in Japan: the Ohsaki Study. *Int J Obes Relat Metab Disord* 2002; 26: 1069-1074.
30. Nakamura K, Okamura T, Kanda H, Hayakawa T, Okayama A, Ueshima H. Medical costs of obese Japanese: a 10-year follow-up study of National Health Insurance in Shiga, Japan. *Eur J Public Health* 2007; 17: 424-429.
31. Statistics and Information Department MsS, Ministry of Health, Labour and Welfare, Japan. The 20th Life Tables. 2000.
32. Reuser M, Bonneux LG, Willekens FJ. Smoking kills, obesity disables: a multistate approach of the US Health and Retirement Survey. *Obesity (Silver Spring)* 2009; 17: 783-789.
33. Clark DO. The effect of walking on lower body disability among older blacks and whites. *Am J Public Health* 1996; 86: 57-61.
34. Mitra S, Findley PA, Sambamoorthi U. Health care expenditures of living with a disability: total expenditures, out-of-pocket expenses, and burden, 1996 to 2004. *Arch Phys Med Rehabil* 2009; 90: 1532-1540.
35. Hu FB, Stampfer MJ, Colditz GA, et al. Physical activity and risk of stroke in women. *JAMA* 2000; 283: 2961-2967.
36. Hakim AA, Curb JD, Petrovitch H, et al. Effects of walking on coronary heart disease in elderly men: the Honolulu Heart Program. *Circulation* 1999; 100: 9-13.

- 1  
2  
3  
4  
5  
6  
7  
8  
9  
10  
11  
12  
13  
14  
15  
16  
17  
18  
19  
20  
21  
22  
23  
24  
25  
26  
27  
28  
29  
30  
31  
32  
33  
34  
35  
36  
37  
38  
39  
40  
41  
42  
43  
44  
45  
46  
47  
48  
49  
50  
51  
52  
53  
54  
55  
56  
57  
58  
59  
60
37. Manson JE, Hu FB, Rich-Edwards JW, et al. A prospective study of walking as compared with vigorous exercise in the prevention of coronary heart disease in women. *N Engl J Med* 1999; 341: 650-658.
38. Hu FB, Sigal RJ, Rich-Edwards JW, et al. Walking compared with vigorous physical activity and risk of type 2 diabetes in women: a prospective study. *JAMA* 1999; 282: 1433-1439.
39. Hayashi T, Tsumura K, Suematsu C, Okada K, Fujii S, Endo G. Walking to work and the risk for hypertension in men: the Osaka Health Survey. *Ann Intern Med* 1999; 131: 21-26.
40. Williams PT. Reduced diabetic, hypertensive, and cholesterol medication use with walking. *Med Sci Sports Exerc* 2008; 40: 433-443.

Table 1. Baseline characteristics by time spent walking categories in 27,738 participants

|                                  | Men                           |                               |                             | Women                         |                               |                             |
|----------------------------------|-------------------------------|-------------------------------|-----------------------------|-------------------------------|-------------------------------|-----------------------------|
|                                  | Time spent walking<br><1 hour | Time spent walking<br>≥1 hour | <i>p</i> value <sup>†</sup> | Time spent walking<br><1 hour | Time spent walking<br>≥1 hour | <i>p</i> value <sup>†</sup> |
| No. of subjects                  | 7,363                         | 8,158                         |                             | 6,303                         | 5,914                         |                             |
| Smoking status (%)               |                               |                               |                             |                               |                               |                             |
| Current and Past smoker          | 81.9                          | 79.8                          | 0.0011                      | 12.6                          | 9.9                           | <0.0001                     |
| Never smoker                     | 18.1                          | 20.2                          |                             | 87.5                          | 90.1                          |                             |
| Alcohol drinking (%)             |                               |                               |                             |                               |                               |                             |
| Never and past drinker           | 26.5                          | 25.1                          | 0.1117                      | 74.7                          | 75.4                          | 0.1380                      |
| Current drinker, 1-449 g/wee     | 61.3                          | 62.2                          |                             | 24.3                          | 23.9                          |                             |
| Current drinker, ≥450 g/weel     | 12.2                          | 12.8                          |                             | 1.1                           | 0.7                           |                             |
| Body mass index (%)              |                               |                               |                             |                               |                               |                             |
| <21 kg/m <sup>2</sup>            | 18.5                          | 20.5                          | <0.0001                     | 18.6                          | 19.4                          | 0.0019                      |
| 21-24.9 kg/m <sup>2</sup>        | 53.3                          | 55.8                          |                             | 50.7                          | 52.9                          |                             |
| ≥25 kg/m <sup>2</sup>            | 28.3                          | 23.7                          |                             | 30.7                          | 27.7                          |                             |
| Self-rated health (%)            |                               |                               |                             |                               |                               |                             |
| Good                             | 73.1                          | 79.3                          | <0.0001                     | 72.5                          | 78.2                          | <0.0001                     |
| Not good                         | 26.9                          | 20.7                          |                             | 27.5                          | 21.8                          |                             |
| Sports and physical activity (%) |                               |                               |                             |                               |                               |                             |
| ≥3 hours/week                    | 13.2                          | 18.7                          | <0.0001                     | 10.7                          | 16.6                          | <0.0001                     |
| <3 hours/week                    | 86.8                          | 81.3                          |                             | 89.3                          | 83.4                          |                             |
| History of hypertension (%)      |                               |                               |                             |                               |                               |                             |
| Presence                         | 21.5                          | 18.6                          | <0.0001                     | 24.2                          | 20.1                          | <0.0001                     |
| Absence                          | 78.5                          | 81.4                          |                             | 75.8                          | 79.9                          |                             |
| History of diabetes mellitus (%) |                               |                               |                             |                               |                               |                             |
| Presence                         | 7.4                           | 4.8                           | <0.0001                     | 5.1                           | 3.2                           | <0.0001                     |
| Absence                          | 92.6                          | 95.2                          |                             | 94.9                          | 96.8                          |                             |
| History of cancer (%)            |                               |                               |                             |                               |                               |                             |
| Presence                         | 2.1                           | 1.8                           | 0.2563                      | 2.8                           | 2.8                           | 0.9032                      |
| Absence                          | 97.9                          | 98.2                          |                             | 97.2                          | 97.2                          |                             |
| History of liver disease (%)     |                               |                               |                             |                               |                               |                             |
| Presence                         | 6.9                           | 5.7                           | 0.0013                      | 3.7                           | 2.9                           | 0.0223                      |
| Absence                          | 93.1                          | 94.4                          |                             | 96.3                          | 97.1                          |                             |
| History of kidney disease (%)    |                               |                               |                             |                               |                               |                             |
| Presence                         | 2.9                           | 2.7                           | 0.3493                      | 3.6                           | 2.7                           | 0.0049                      |
| Absence                          | 97.1                          | 97.3                          |                             | 96.4                          | 97.3                          |                             |

<sup>†</sup> *p* values were calculated by chi-squared test.

Table 2. Mortality ratio for time spent walking categories in 27,738 participants.

|       | Time spent walking | Univariate      |                         |                | Multiadjusted <sup>†</sup> |                         |                |
|-------|--------------------|-----------------|-------------------------|----------------|----------------------------|-------------------------|----------------|
|       |                    | Mortality ratio | 95% confidence interval | <i>p</i> value | Mortality ratio            | 95% confidence interval | <i>p</i> value |
| Men   | <1 hour            | 1.00            |                         |                | 1.00                       |                         |                |
|       | ≥1 hour            | 0.87            | 0.80 - 0.94             | 0.0009         | 0.90                       | 0.82 - 0.98             | 0.0153         |
| Women | <1 hour            | 1.00            |                         |                | 1.00                       |                         |                |
|       | ≥1 hour            | 0.89            | 0.77 - 1.03             | 0.1135         | 0.95                       | 0.82 - 1.10             | 0.4693         |

<sup>†</sup> Adjusted for age groups, smoking status, alcohol drinking, body mass index, self-rated health, sports and physical activity, and history of hypertension disease, diabetes mellitus, cancer, liver disease and kidney disease.

Table 3. Life expectancy and lifetime medical expenditure at age 40 years for time spent walking categories in 27,738 participants.

|       | Time spent walking                               | Univariate |                         |                | Multiadjusted <sup>†</sup> |                         |                |
|-------|--------------------------------------------------|------------|-------------------------|----------------|----------------------------|-------------------------|----------------|
|       |                                                  | Estimate   | 95% confidence interval | <i>p</i> value | Estimate                   | 95% confidence interval | <i>p</i> value |
| Men   | Life expectancy at age 40 years (years)          |            |                         |                |                            |                         |                |
|       | <1 hour                                          | 42.41      | 41.45 - 43.26           |                | 43.43                      | 42.39 - 44.41           |                |
|       | ≥1 hour                                          | 44.19      | 43.15 - 45.19           | 0.0004         | 44.81                      | 43.66 - 45.94           | 0.0073         |
|       | Lifetime medical expenditure at age 40 years (£) |            |                         |                |                            |                         |                |
|       | <1 hour                                          | 107,023.2  | 101,093.6 - 113,066.3   |                | 107,544.2                  | 101,234.0 - 114,044.6   |                |
|       | ≥1 hour                                          | 94,402.1   | 87,812.3 - 101,248.0    | <0.0001        | 99,423.6                   | 92,515.9 - 106,694.7    | 0.0048         |
| Women | Life expectancy at age 40 years (years)          |            |                         |                |                            |                         |                |
|       | <1 hour                                          | 52.25      | 49.79 - 54.92           |                | 56.62                      | 53.17 - 60.62           | 0.2351         |
|       | ≥1 hour                                          | 54.25      | 51.38 - 57.48           | 0.0569         | 57.78                      | 54.02 - 62.22           |                |
|       | Lifetime medical expenditure at age 40 years (£) |            |                         |                |                            |                         |                |
|       | <1 hour                                          | 123,553.0  | 111,619.5 - 137,549.6   |                | 131,766.8                  | 115,902.4 - 150,714.3   |                |
|       | ≥1 hour                                          | 115,896.0  | 102,406.6 - 131,792.1   | 0.0644         | 128,161.2                  | 111,335.0 - 148,494.7   | 0.2559         |

<sup>†</sup> Adjusted for age groups, smoking status, alcohol drinking, body mass index, self-rated health, sports and physical activity, and history of hypertension disease, diabetes mellitus, cancer, liver disease and kidney disease.

only



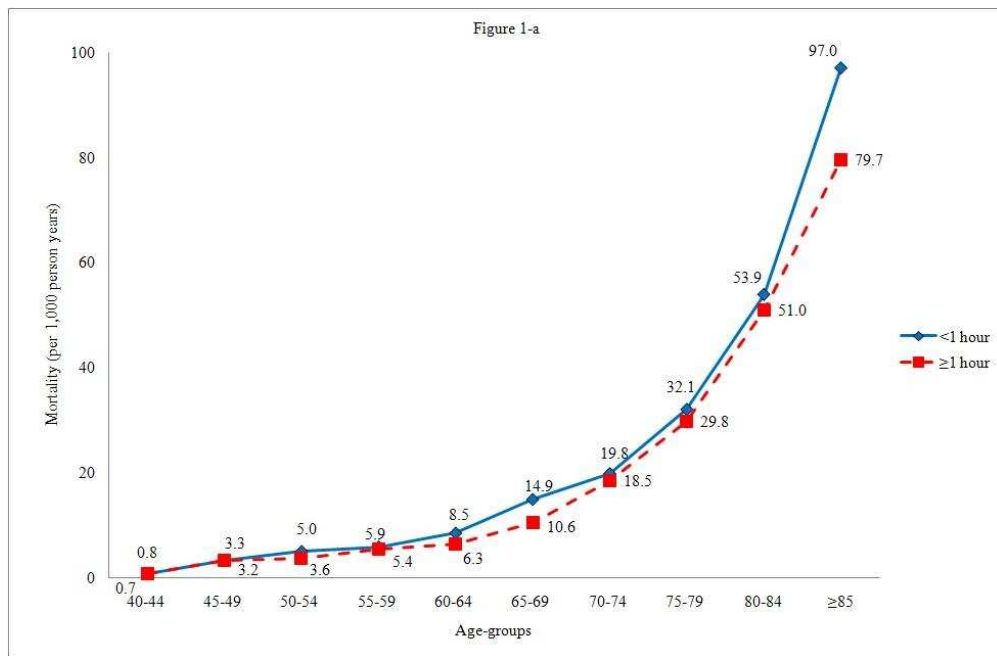

258x169mm (96 x 96 DPI)

Review only

1  
2  
3  
4  
5  
6  
7  
8  
9  
10  
11  
12  
13  
14  
15  
16  
17  
18  
19  
20  
21  
22  
23  
24  
25  
26  
27  
28  
29  
30  
31  
32  
33  
34  
35  
36  
37  
38  
39  
40  
41  
42  
43  
44  
45  
46  
47  
48  
49  
50  
51  
52  
53  
54  
55  
56  
57  
58  
59  
60

1  
2  
3  
4  
5  
6  
7  
8  
9  
10  
11  
12  
13  
14  
15  
16  
17  
18  
19  
20  
21  
22  
23  
24  
25  
26  
27  
28  
29  
30  
31  
32  
33  
34  
35  
36  
37  
38  
39  
40  
41  
42  
43  
44  
45  
46  
47  
48  
49  
50  
51  
52  
53  
54  
55  
56  
57  
58  
59  
60

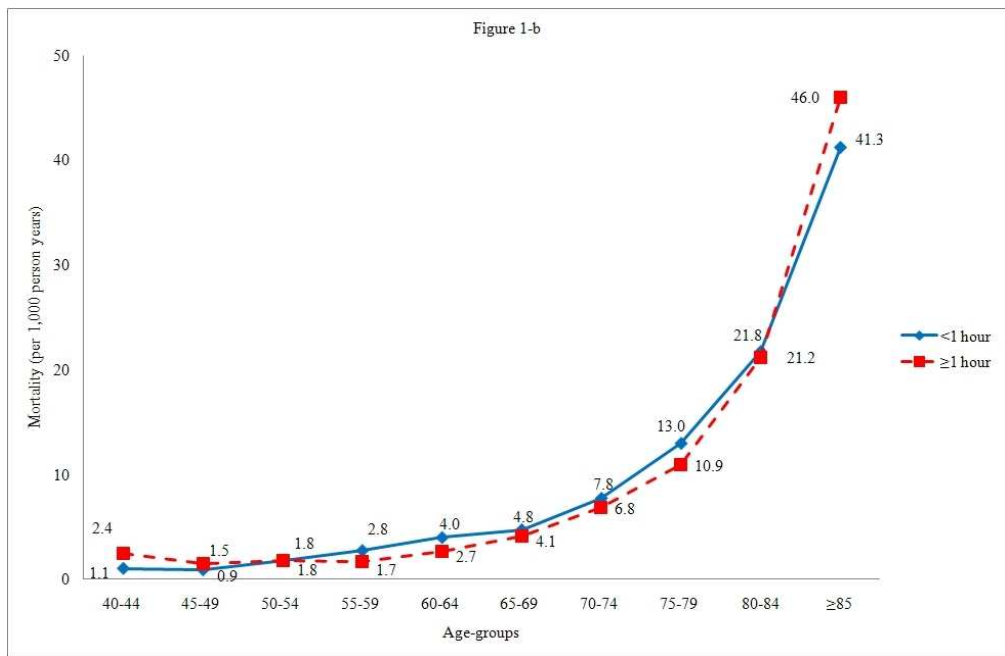

258x169mm (96 x 96 DPI)

Review only

STROBE 2007 (v4) Statement—Checklist of items that should be included in reports of *cohort studies*

| Section/Topic                | Item # | Recommendation                                                                                                                                                                       | Reported on page # |
|------------------------------|--------|--------------------------------------------------------------------------------------------------------------------------------------------------------------------------------------|--------------------|
| Title and abstract           | 1      | (a) Indicate the study's design with a commonly used term in the title or the abstract                                                                                               | p. 1, 3            |
|                              |        | (b) Provide in the abstract an informative and balanced summary of what was done and what was found                                                                                  | p. 3, 4            |
| <b>Introduction</b>          |        |                                                                                                                                                                                      |                    |
| Background/rationale         | 2      | Explain the scientific background and rationale for the investigation being reported                                                                                                 | p. 5               |
| Objectives                   | 3      | State specific objectives, including any prespecified hypotheses                                                                                                                     | p. 5, 6            |
| <b>Methods</b>               |        |                                                                                                                                                                                      |                    |
| Study design                 | 4      | Present key elements of study design early in the paper                                                                                                                              | p. 6               |
| Setting                      | 5      | Describe the setting, locations, and relevant dates, including periods of recruitment, exposure, follow-up, and data collection                                                      | p. 7-9             |
| Participants                 | 6      | (a) Give the eligibility criteria, and the sources and methods of selection of participants. Describe methods of follow-up                                                           | p. 7-8             |
|                              |        | (b) For matched studies, give matching criteria and number of exposed and unexposed                                                                                                  |                    |
| Variables                    | 7      | Clearly define all outcomes, exposures, predictors, potential confounders, and effect modifiers. Give diagnostic criteria, if applicable                                             | p. 8-11            |
| Data sources/<br>measurement | 8*     | For each variable of interest, give sources of data and details of methods of assessment (measurement). Describe comparability of assessment methods if there is more than one group | p. 8-11            |
| Bias                         | 9      | Describe any efforts to address potential sources of bias                                                                                                                            | p. 10              |
| Study size                   | 10     | Explain how the study size was arrived at                                                                                                                                            | p. 8               |
| Quantitative variables       | 11     | Explain how quantitative variables were handled in the analyses. If applicable, describe which groupings were chosen and why                                                         | p. 10              |
| Statistical methods          | 12     | (a) Describe all statistical methods, including those used to control for confounding                                                                                                | p. 9-11            |
|                              |        | (b) Describe any methods used to examine subgroups and interactions                                                                                                                  | -                  |
|                              |        | (c) Explain how missing data were addressed                                                                                                                                          | -                  |
|                              |        | (d) If applicable, explain how loss to follow-up was addressed                                                                                                                       | p. 8, 9            |
|                              |        | (e) Describe any sensitivity analyses                                                                                                                                                | p. 9-11-           |
| <b>Results</b>               |        |                                                                                                                                                                                      |                    |

|                          |     |                                                                                                                                                                                                              |           |
|--------------------------|-----|--------------------------------------------------------------------------------------------------------------------------------------------------------------------------------------------------------------|-----------|
| Participants             | 13* | (a) Report numbers of individuals at each stage of study—eg numbers potentially eligible, examined for eligibility, confirmed eligible, included in the study, completing follow-up, and analysed            | p. 7, 8   |
|                          |     | (b) Give reasons for non-participation at each stage                                                                                                                                                         | p. 7, 8   |
|                          |     | (c) Consider use of a flow diagram                                                                                                                                                                           | -         |
| Descriptive data         | 14* | (a) Give characteristics of study participants (eg demographic, clinical, social) and information on exposures and potential confounders                                                                     | p. 12     |
|                          |     | (b) Indicate number of participants with missing data for each variable of interest                                                                                                                          | -         |
|                          |     | (c) Summarise follow-up time (eg, average and total amount)                                                                                                                                                  | p. 12     |
| Outcome data             | 15* | Report numbers of outcome events or summary measures over time                                                                                                                                               | -         |
| Main results             | 16  | (a) Give unadjusted estimates and, if applicable, confounder-adjusted estimates and their precision (eg, 95% confidence interval). Make clear which confounders were adjusted for and why they were included | p. 13, 14 |
|                          |     | (b) Report category boundaries when continuous variables were categorized                                                                                                                                    | p. 8, 10  |
|                          |     | (c) If relevant, consider translating estimates of relative risk into absolute risk for a meaningful time period                                                                                             | -         |
| Other analyses           | 17  | Report other analyses done—eg analyses of subgroups and interactions, and sensitivity analyses                                                                                                               | -         |
| <b>Discussion</b>        |     |                                                                                                                                                                                                              |           |
| Key results              | 18  | Summarise key results with reference to study objectives                                                                                                                                                     | p. 15     |
| <b>Limitations</b>       |     |                                                                                                                                                                                                              |           |
| Interpretation           | 20  | Give a cautious overall interpretation of results considering objectives, limitations, multiplicity of analyses, results from similar studies, and other relevant evidence                                   | p. 15-18  |
| Generalisability         | 21  | Discuss the generalisability (external validity) of the study results                                                                                                                                        | p. 17     |
| <b>Other information</b> |     |                                                                                                                                                                                                              |           |
| Funding                  | 22  | Give the source of funding and the role of the funders for the present study and, if applicable, for the original study on which the present article is based                                                | p. 20     |

\*Give information separately for cases and controls in case-control studies and, if applicable, for exposed and unexposed groups in cohort and cross-sectional studies.

**Note:** An Explanation and Elaboration article discusses each checklist item and gives methodological background and published examples of transparent reporting. The STROBE checklist is best used in conjunction with this article (freely available on the Web sites of PLoS Medicine at <http://www.plosmedicine.org/>, Annals of Internal Medicine at <http://www.annals.org/>, and Epidemiology at <http://www.epidem.com/>). Information on the STROBE Initiative is available at [www.strobe-statement.org](http://www.strobe-statement.org).

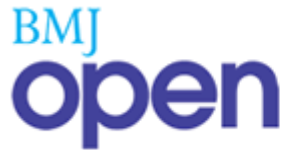

## Impact of Walking on Life Expectancy and Lifetime Medical Expenditure: The Ohsaki Cohort Study

|                                 |                                                                                                                                                                                                                                                                                                                                                                                                                                                                                                                                                                                                                                                                                                                                                                                                                                                                                                                                                                                                                                                                                                                                                                                                                            |
|---------------------------------|----------------------------------------------------------------------------------------------------------------------------------------------------------------------------------------------------------------------------------------------------------------------------------------------------------------------------------------------------------------------------------------------------------------------------------------------------------------------------------------------------------------------------------------------------------------------------------------------------------------------------------------------------------------------------------------------------------------------------------------------------------------------------------------------------------------------------------------------------------------------------------------------------------------------------------------------------------------------------------------------------------------------------------------------------------------------------------------------------------------------------------------------------------------------------------------------------------------------------|
| Journal:                        | <i>BMJ Open</i>                                                                                                                                                                                                                                                                                                                                                                                                                                                                                                                                                                                                                                                                                                                                                                                                                                                                                                                                                                                                                                                                                                                                                                                                            |
| Manuscript ID:                  | bmjopen-2011-000240.R1                                                                                                                                                                                                                                                                                                                                                                                                                                                                                                                                                                                                                                                                                                                                                                                                                                                                                                                                                                                                                                                                                                                                                                                                     |
| Article Type:                   | Research                                                                                                                                                                                                                                                                                                                                                                                                                                                                                                                                                                                                                                                                                                                                                                                                                                                                                                                                                                                                                                                                                                                                                                                                                   |
| Date Submitted by the Author:   | 25-Aug-2011                                                                                                                                                                                                                                                                                                                                                                                                                                                                                                                                                                                                                                                                                                                                                                                                                                                                                                                                                                                                                                                                                                                                                                                                                |
| Complete List of Authors:       | <p>Nagai, Masato; Tohoku University Graduate School of Medicine, Division of Epidemiology, Department of Public Health and Forensic Medicine</p> <p>Kuriyama, Shinichi; Tohoku University Graduate School of Medicine, Department of Molecular Epidemiology, Environment and Genome Research Center</p> <p>Kakizaki, Masako; Tohoku University Graduate School of Medicine, Division of Epidemiology, Department of Public Health and Forensic Medicine</p> <p>Ohmori-Matsuda, Kaori; Tohoku University Graduate School of Medicine, Division of Epidemiology, Department of Public Health and Forensic Medicine</p> <p>Sone, Toshimasa; Tohoku University Graduate School of Medicine, Division of Epidemiology, Department of Public Health and Forensic Medicine</p> <p>Hozawa, Atsushi; Yamagata University Graduate School of Medical Science, Department of Public Health</p> <p>Kawado, Miyuki; Fujita Health University School of Medicine, Department of Hygiene</p> <p>Hashimoto, Shuji; Fujita Health University School of Medicine, Department of Hygiene</p> <p>Tsuji, Ichiro; Tohoku University Graduate School of Medicine, Division of Epidemiology, Department of Public Health and Forensic Medicine</p> |
| <b>Primary Subject Heading</b>: | Epidemiology                                                                                                                                                                                                                                                                                                                                                                                                                                                                                                                                                                                                                                                                                                                                                                                                                                                                                                                                                                                                                                                                                                                                                                                                               |
| Keywords:                       | walking, lifetime medical expenditure, life expectancy, physical activity                                                                                                                                                                                                                                                                                                                                                                                                                                                                                                                                                                                                                                                                                                                                                                                                                                                                                                                                                                                                                                                                                                                                                  |
|                                 |                                                                                                                                                                                                                                                                                                                                                                                                                                                                                                                                                                                                                                                                                                                                                                                                                                                                                                                                                                                                                                                                                                                                                                                                                            |

SCHOLARONE™  
Manuscripts

## Research

### **Impact of Walking on Life Expectancy and Lifetime Medical Expenditure: The Ohsaki Cohort Study**

Masato Nagai, MSc<sup>1</sup>, Shinichi Kuriyama, MD, PhD<sup>1,2</sup>, Masako Kakizaki, PhD<sup>1</sup>, Kaori Ohmori-Matsuda, MD, PhD<sup>1</sup>, Toshimasa Sone, MSc<sup>1</sup>, Atsushi Hozawa, MD, PhD<sup>1,3</sup>, Miyuki Kawado, PhD<sup>4</sup>, Shuji Hashimoto, PhD<sup>4</sup>, and Ichiro Tsuji, MD, PhD<sup>1</sup>

<sup>1</sup> Division of Epidemiology, Department of Public Health and Forensic Medicine, Tohoku University Graduate School of Medicine, Sendai, Japan

<sup>2</sup> Department of Molecular Epidemiology, Environment and Genome Research Center, Tohoku University Graduate School of Medicine, Sendai, Japan

<sup>3</sup> Department of Public Health, Yamagata University Graduate School of Medical Science, Yamagata, Japan

<sup>4</sup> Department of Hygiene, Fujita Health University School of Medicine, Toyoake, Japan

#### Address for correspondence:

Masato Nagai, MSc.

Division of Epidemiology, Department of Public Health and Forensic Medicine, Tohoku

1  
2  
3  
4  
5  
6  
7 University Graduate School of Medicine, Sendai, Japan

8  
9 2-1 Seiryō-machi, Aoba-ku, Sendai, Miyagi, 980-8575, Japan

10  
11  
12 Phone: +81-22-717-8123

13  
14  
15 Fax: +81-22-717-8125

16  
17  
18 E-mail: [m-nagai@med.tohoku.ac.jp](mailto:m-nagai@med.tohoku.ac.jp)

19  
20  
21  
22  
23 Manuscript information:

24  
25  
26 #Word counts: 3,021

27  
28  
29 #References: 41

30  
31  
32 #Tables: 3

33  
34  
35 #Figures: 2

36  
37  
38 #Page: 34

## Abstract

### Objective

People who spend a longer time walking have lower demands for medical care. However, in view of their longer life expectancy, it is unclear whether their lifetime medical expenditure increases or decreases. The present study examined the association between time spent walking, life expectancy, and lifetime medical expenditure.

### Method

We followed up 27,738 participants aged 40-79 years and prospectively collected data on their medical expenditure and survival covering a 13-year period. Participants were classified into those walking  $<1$  and  $\geq 1$  hour per day. We constructed life tables, and estimated the life expectancy and lifetime medical expenditure from 40 years of age using estimate of multiadjusted mortality and medical expenditure by Poisson regression model and linear regression model, respectively.

### Results

Participants who walked  $\geq 1$  hour per day have longer life expectancy from 40 years of age than participants who walked  $<1$  hour per day. The multiadjusted life expectancy for those who walked  $\geq 1$  hour per day was 44.81 years, being significantly lower by 1.38 years in men ( $p=0.0073$ ) in men and 57.78 years in women, being non-significantly lower by 1.16 years in women ( $p=0.2351$ ). In spite of their longer life expectancy, participants who walked  $\geq 1$  hour per day required lower lifetime medical expenditure from 40 years



1  
2  
3  
4  
5  
6  
7 of age than participants who walked <1 hour per day. The multiadjusted lifetime medical  
8  
9  
10 expenditure for those who walked  $\geq 1$  hour per day was £99,423.6, being significantly  
11  
12 lower by 7.6% in men ( $p=0.0048$ ) and £128,161.2, being non-significantly lower by 2.7%  
13  
14  
15 in women ( $p=0.2559$ ).  
16

## 17 Discussion

18  
19  
20 Increased longevity resulting from a healthier lifestyle does not necessarily translate into  
21  
22  
23 an increased amount of medical expenditure throughout life. Encouraging people to walk  
24  
25  
26 may extend life expectancy and decrease lifetime medical expenditure, especially men.  
27  
28  
29  
30  
31

32 (285 words)  
33  
34  
35  
36  
37  
38  
39

## 40 Key Words:

41  
42  
43 walking; lifetime medical expenditure; life expectancy; physical activity;  
44  
45  
46  
47  
48  
49  
50  
51  
52  
53  
54  
55  
56

## 57 INTRODUCTION

58  
59  
60 Previous studies have agreed that a higher level of physical activity extends life

1  
2  
3  
4  
5  
6  
7 expectancy.<sup>1-4</sup> Walking is part of a physically active lifestyle. Previous studies have  
8  
9 indicated that a longer time spent walking,<sup>5-13</sup> walking pace,<sup>8, 14-16</sup> and a longer distance  
10  
11 walked<sup>17, 18</sup> are significantly associated with a decreased risk of mortality.  
12  
13

14  
15 We previously reported that medical expenditure per month was significantly reduced  
16  
17 among those who spent a longer time walking, based on the same cohort dataset as that  
18  
19 used here.<sup>19</sup> Similar findings have been reported worldwide.<sup>20, 21</sup> However, in view of  
20  
21 the increased life expectancy of those who walk for a longer time, it is unclear whether  
22  
23 lifetime medical expenditure increases or decreases as a result. In other words, the  
24  
25 question to be answered here is whether a lifelong healthy lifestyle eventually increases  
26  
27 lifetime medical expenditure because of extended life expectancy.  
28  
29  
30  
31  
32  
33

34  
35 So far, only one study has examined the association between physical activity and  
36  
37 lifetime costs.<sup>4</sup> This revealed that people with a high physical activity level tended to  
38  
39 live longer than people with a lower physical activity level, and that the former had lower  
40  
41 lifetime medical costs than the latter. However, that study was only a simulation analysis  
42  
43 based on assumed variations in the health and economic effects of active and sedentary  
44  
45 lifestyles.  
46  
47  
48  
49  
50

51  
52 The objective of the present study was to examine the association between walking,  
53  
54 life expectancy, and lifetime medical expenditure using actual individual data derived  
55  
56 from a population-based 13-year prospective observation period. The population  
57  
58 comprised 27,738 Japanese adults aged 40-79 years living in the community who were  
59  
60

1  
2  
3  
4  
5  
6  
7 free of any functional limitations or chronic conditions interfering with physical activity,  
8  
9  
10 with an accrued total of 285,342 person-years. This cohort study has been monitoring  
11  
12 survival and medical care utilization, and its costs, for all participants.<sup>19, 22, 23</sup> Using this  
13  
14  
15 dataset, we constructed a life table to estimate life expectancy and lifetime medical  
16  
17  
18 expenditure according to the time spent walking.<sup>23-25</sup>  
19  
20  
21  
22  
23  
24  
25  
26  
27  
28  
29  
30  
31  
32  
33  
34  
35  
36  
37  
38  
39  
40  
41  
42  
43  
44  
45  
46  
47  
48  
49  
50  
51  
52  
53  
54  
55  
56

## 57 MATERIALS AND METHODS

58  
59  
60

## Study cohort

The present data were derived from the Ohsaki National Health Insurance (NHI) Cohort Study.<sup>19, 22, 23, 26</sup> We conducted a self-administered questionnaire survey of various lifestyle habits between October and December 1994 for all NHI beneficiaries aged 40 to 79 years who lived in the catchment area of Ohsaki Public Health Center, Miyagi Prefecture, northeastern Japan. Out of 54,996 eligible individuals, 52,029 (95%) responded.

We excluded 776 participants who had withdrawn from the NHI before January 1, 1995 because their cost data were not available. Thus, the remaining 51,253 participants formed the study cohort. The study protocol was approved by the Ethics Committee of Tohoku University School of Medicine. Participants who had returned the self-administered questionnaires and signed them were considered to have consented to participate.

For the present analysis, we excluded participants who had functional limitation or chronic conditions interfering with physical activity. Physical function status was assessed using the 6-item measure of the Medical Outcomes Study (MOS) Short-form General Health Survey.<sup>27</sup> Participants were excluded if they stated on the MOS questionnaire that they were unable to perform moderate or vigorous activities (n=15,916). We excluded participants who reported severe bodily pain (n=949), or history of stroke (n=474), myocardial infarction (n=585) or arthritis (n=2,176). We also

1  
2  
3  
4  
5  
6  
7 excluded those who died within the first year (n=174) or did not provide complete  
8  
9 responses in the walking status questionnaire (n=3,241). Thus, a total of 27,738  
10  
11 participants (15,521 men and 12,217 women) remained. These participants were  
12  
13 apparently healthy enough to walk for as long as they wished.  
14  
15

### 20 **Time spent walking**

21  
22 The self-administered questionnaire included items on time spent walking. **Time spent**  
23 **walking was assessed through the subject's response to the question, "About how much**  
24 **time do you walk per day on average? ". The participants were asked to choose one of**  
25 **three answers: "1 hour or more" "30 minutes - 1 hour" or "30 minutes or less". In Japan,**  
26 **the Ministry of Health, Labour and Welfare recommended to walk  $\geq 1$  hour per day in**  
27 **Exercise and Physical Activity Reference for Health Promotion 2006. Then, we divided**  
28 **the participants into two groups according to the time spent walking daily:  $< 1$  hour and  $\geq 1$**   
29 **hour. We had previously evaluated and reported the validity of self-reported time spent**  
30 **walking.** <sup>5, 19, 28</sup> This validation study had indicated that self-reported walking time was  
31  
32 reasonably reproducible and sufficiently valid for studying the health effects of walking.  
33  
34  
35  
36  
37  
38  
39  
40  
41  
42  
43  
44  
45  
46  
47  
48  
49  
50  
51  
52  
53

### 54 **Health insurance system in Japan**

55  
56 Details of the Japanese NHI system have been described previously.<sup>22, 23, 29, 30</sup> Briefly,  
57  
58 everyone living in Japan is required to enroll in a health insurance system. The NHI  
59  
60

1  
2  
3  
4  
5  
6 covers 35% of the Japanese population, mainly farmers, self employed, or retired people.

7  
8  
9 The NHI covers almost all medical treatment, including diagnostic tests, medication,  
10  
11 surgery, supplies and materials, physicians and other personnel costs, inpatient care, and  
12  
13 most dental treatment. It covers treatment by physicians and nurses but not that by other  
14  
15 professionals such as home health aides. Payment to medical providers is made on a  
16  
17 fee-for-service basis, where the price of each service is determined by a uniform national  
18  
19 fee schedule.  
20  
21  
22  
23  
24

25  
26 When a participant withdraws from the NHI system because of death, emigration, or  
27  
28 employment, the withdrawal date and its reason are coded in the NHI withdrawal history  
29  
30 files. We recorded any mortality or migration by reviewing the NHI withdrawal history  
31  
32 files and collected data on the death of participants by reviewing the death certificates  
33  
34 filed at Ohsaki Public Health Center. We thus followed up the participants and  
35  
36 prospectively collected data on medical care utilization and its costs for all individuals in  
37  
38 the cohort from January 1 1995 through December 31 2007. Study participants (16.3%)  
39  
40 were lost to follow-up, thus their vital status was unknown.  
41  
42  
43  
44  
45  
46  
47  
48  
49  
50  
51  
52  
53

#### 54 **Statistical analysis**

55  
56 Using the Ohsaki NHI cohort database, we estimated mortality and medical expenditure  
57  
58 for individual age-groups, and for the categories of time spent walking, for both men and  
59  
60

1  
2  
3  
4  
5  
6  
7 women. We divided age in to the following groups: 40-44, 45-49, 50-54, 55-59, 60-64,  
8  
9 65-69, 70-74, 75-79, 80-84, and  $\geq 85$  years. The multiadjusted mortality rates for each age  
10  
11 category were estimated from a Poisson regression model based on person-years and the  
12  
13 number of deaths from 1996 until 2007. The dependent variable was mortality and  
14  
15 independent variables were age-groups, categories of time spent walking, and the  
16  
17 following covariates: smoking status (current and past smoker, or never smoker), alcohol  
18  
19 consumption (current drinker consuming 1-499 g/week, current drinker consuming  $\geq 450$   
20  
21 g/week, or never and past drinker), body mass index (BMI:  $< 21$  kg/m<sup>2</sup>, 21-24.9 kg/m<sup>2</sup>, or  
22  
23  $\geq 25$  kg/m<sup>2</sup>), self-rated health (good or not good), sports and physical activity ( $\geq 3$   
24  
25 hours/week or  $< 3$  hours/week), history of hypertension disease (presence or absence),  
26  
27 history of diabetes mellitus (presence or absence), history of cancer (presence or absence),  
28  
29 history of liver disease (presence or absence), and history of kidney disease (presence or  
30  
31 absence).<sup>19</sup> The data of all covariates was obtained from self-administered questionnaire.

32  
33 We estimated the mortality of participants aged  $\geq 85$  years by multiplying the estimated  
34  
35 mortality for the 85-89 year age-group by the ratio of mortality for the same age-group  
36  
37 relative to the mortality for  $\geq 85$  years from complete life tables for the year 2000, as there  
38  
39 were few person-years for participants aged over 90 years in our dataset.<sup>31</sup>

40  
41 Because medical expenditure increases before death, we separately calculated medical  
42  
43 expenditure for participants who survived through the index year and for those who died.

44  
45 The multiadjusted medical expenditure per year for survivors and decedents, respectively,

was estimated for each of the age-groups and the categories of time spent walking using a linear regression model adjusted for the above covariates.

The estimates of multiadjusted mortality and medical expenditure for each age-group were used for estimating life expectancy and lifetime medical expenditure from 40 years of age. Life expectancy was calculated using Chiang's analytical method on the basis of the latest published complete life tables of Japan for the year 2000.<sup>23, 24, 31</sup> Lifetime medical expenditure was estimated from the sum obtained by multiplying the static population in life table by the medical expenditure for survivors and the number of deaths in the life table by the increased medical expenditure due to death, which was calculated by subtracting the medical expenditure in year of survivors from that in the period of 1 year before death. That is, life expectancy ( $e_x$ ) and lifetime medical expenditure ( $M_x$ ) for each age-groups (x) were estimated using the numbers of survivors ( $l_x$ ), deaths ( $d_x$ ), static population ( $L_x$ ), multiadjusted medical expenditure for survivors ( $a_y$ ), and multiadjusted medical expenditure for the deceased ( $b_y$ ) as follows;

$\sum_{y \geq x}$  is sum of  $y \geq x$

$$e_x = \frac{\sum L_y}{l_x}$$

$$M_x = \frac{\sum (L_y \cdot a_y + d_y \cdot b_y)}{l_x}$$

The 95% confidence intervals (CIs) were estimated using a Monte Carlo simulation based on a Poisson regression model and linear regression model. We repeated 100,000



1  
2  
3  
4  
5  
6  
7 times and all analysis were used the SAS version 9.1 statistical software package (SAS  
8  
9 Institute Inc., 2004).

10  
11 We used a purchasing power parity rate of UK£ 1.00=JPN\ 140.  
12  
13  
14  
15  
16  
17  
18  
19  
20  
21  
22  
23  
24  
25  
26  
27  
28  
29  
30  
31  
32  
33  
34  
35  
36  
37  
38  
39  
40  
41  
42  
43  
44  
45  
46  
47  
48  
49  
50  
51  
52  
53

## 54 **RESULTS**

55  
56 After 13 years of follow-up, we observed 2,936 deaths (2,193 men and 743 women)  
57  
58 among the 27,738 participants (15,521 men and 12,217 women). Mean medical  
59  
60

1  
2  
3  
4  
5  
6 expenditure per year for survivors who walked  $\geq 1$  hour per day was £1,714.2 in men and  
7  
8  
9 £1,621.4 in women, being significantly lower than for those who walked  $< 1$  hour per day  
10  
11  
12 (men; £2,064.3,  $p < 0.0001$ , women; £1,878.6,  $p < 0.0001$ ). Also, mean medical  
13  
14  
15 expenditure in the year of death for participants who walked  $\geq 1$  hour per day was  
16  
17  
18 £16,878.6 in men and £17,464.3 in women, which was not significantly different from  
19  
20  
21 those who walked  $< 1$  hour per day (men; £16,650.0,  $p = 0.7315$ , women; £17,742.9,  
22  
23  
24  $p = 0.8330$ ).

### 25 26 27 28 29 **Baseline characteristics in terms of categories for time spent walking**

30  
31  
32 Table 1 shows the baseline characteristics of the study participants according to the  
33  
34  
35 categories of time spent walking for men and women, respectively.

36  
37  
38 As compared with those who walked  $< 1$  hour per day, participants who walked  $\geq 1$   
39  
40  
41 hour per day were less likely to be smokers and obese. Self-reported history of  
42  
43  
44 hypertension, diabetes mellitus, and liver disease were all significantly less prevalent in  
45  
46  
47 those who walked  $\geq 1$  hour per day.  
48  
49  
50  
51  
52  
53

### 54 **Mortality in terms of categories for time spent walking**

55  
56  
57 Figure 1-a for men and Figure 1-b for women show the multiadjusted mortality (per  
58  
59  
60 1,000) in each of the age-groups according to the categories of time spent walking.

1  
2  
3  
4  
5  
6  
7 In men in each age-group, multiadjusted mortality was lower in participants who  
8  
9 walked  $\geq 1$  hour per day than in those who walked  $< 1$  hour per day. In women in all  
10  
11 age-groups except for the aged 40-44 and 45-49 year groups, multiadjusted mortality was  
12  
13 lower in participants who walked  $\geq 1$  hour per day than in those who walked  $< 1$  hour per  
14  
15 day.  
16  
17  
18  
19

20  
21 Table 2 shows the mortality ratio with 95% CIs according to the categories of time spent  
22  
23 walking. In men, the multiadjusted mortality ratio for participants who walked  $\geq 1$  hour  
24  
25 per day was significantly lower than that for participants who walked  $< 1$  hour per day  
26  
27 (0.90, 95% CIs; 0.82-0.98,  $p=0.0153$ ). In women, the multiadjusted mortality ratio for  
28  
29 participants who walked  $\geq 1$  hour per day was non-significantly lower than that for  
30  
31 participants who walked  $< 1$  hour per day (0.95, 95% CIs; 0.82-1.10,  $p=0.4693$ ).  
32  
33  
34  
35  
36  
37  
38  
39

#### 40 **Life expectancy and lifetime medical expenditure in terms of time spent walking**

41  
42  
43 Table 3 shows life expectancy and lifetime medical expenditure from 40 years of age with  
44  
45 95% CIs according to the categories of time spent walking.  
46  
47  
48

49 In men, the multiadjusted life expectancy of those who walked  $\geq 1$  hour per day was  
50  
51 44.81 years (95% CI; 43.66-45.94), which was **significantly** longer by 1.38 years  
52  
53 ( $p=0.0073$ ) than for those who walked  $< 1$  hour per day (43.43 years; 95% CI;  
54  
55 42.39-44.41). In women, the same results were observed, although **the differences did**  
56  
57  
58  
59  
60 **not reach statistical significance.**

1  
2  
3  
4  
5  
6  
7 In spite of their longer life expectancy, their lifetime medical expenditure from 40  
8  
9 years of age was significantly lower in men and non-significantly lower in women. The  
10  
11 multiadjusted lifetime medical expenditure for participants who walked  $\geq 1$  hour per day  
12  
13 was £99,423.6 (95% CI; 92,515.9-106,694.7), being significantly lower by 7.6%  
14  
15 ( $p=0.0048$ ) than for those who walked  $<1$  hour per day (£107,544.2; 95% CI;  
16  
17 101,234.0-114,044.6). In women, the multiadjusted lifetime medical expenditure for  
18  
19 participants who walked  $\geq 1$  hour per day was £128,161.2 (95% CI; 111,335.0-148,494.7),  
20  
21 being non-significantly lower by 2.7% ( $p=0.2559$ ) than for those who walked  $<1$  hour per  
22  
23 day (£131,766.8; 95% CI; 115,902.4-150,714.3).  
24  
25  
26  
27  
28  
29  
30  
31  
32  
33  
34  
35  
36  
37  
38  
39  
40  
41  
42  
43  
44  
45  
46  
47  
48  
49  
50  
51  
52  
53

## 54 DISCUSSION

55  
56  
57 The present results indicate that multiadjusted lifetime medical expenditure from the age  
58  
59 of 40 years for those who walked  $\geq 1$  hour per day was significantly lower by 7.6% in men  
60

1  
2  
3  
4  
5  
6  
7 and **non-significantly** lower by 2.7% in women than for those who walked <1 hour per  
8  
9 day. This decrease in lifetime medical expenditure was observed in spite of longer life  
10  
11 expectancy (1.38 years for men and 1.16 years for women) among those who walked  $\geq$ 1  
12  
13 hour per day. Thus, a healthy lifestyle not only extended longevity, but also decreased the  
14  
15 amount of lifetime medical expenditure, **especially men**.

16  
17  
18  
19  
20  
21 **We observed statistically significant differences for men but not for women.**

22  
23 **Although the differences did not reach statistical significance, the same results were**  
24  
25 **observed for women. The reason why the impact of walking was smaller in women than**  
26  
27 **in men was unknown. In women, other factors such as obesity and postmenopausal**  
28  
29 **change might have stronger impact on life expectancy and lifetime medical expenditure**  
30  
31 **than walking.**

### 40 **Comparison with other studies**

41  
42  
43 Four studies have addressed the association between physical activity level and life  
44  
45 expectancy.<sup>1-4</sup> Additionally, studies investigating associations between time spent  
46  
47 walking,<sup>5-13</sup> or distance walked<sup>17, 18</sup> and mortality have consistently shown that  
48  
49 participants who have higher physical activity have longer life expectancy and lower  
50  
51 mortality than participants who have lower physical activity. Only one study has reported  
52  
53 the association between physical activity and lifetime medical expenditure.<sup>4</sup> In a  
54  
55 simulation study, Keeler et al. demonstrated that if participants with a sedentary life style  
56  
57  
58  
59  
60

1  
2  
3  
4  
5  
6  
7 had exercised regularly, the additional exercise would have increased their life  
8  
9  
10 expectancy by 300 days and saved £1,900 in lifetime costs. Even though there is a  
11  
12 difference between physical activity and walking, this result is consistent with the present  
13  
14 finding that participants who walked  $\geq 1$  hour per day lived longer and had lower lifetime  
15  
16 medical expenditure.  
17  
18

19  
20 We previously calculated life expectancy and lifetime medical expenditure in relation  
21  
22 to smoking and BMI from age 40 years using the same dataset as that for the present study.  
23  
24  
25  
26  
27  
28  
29  
30  
31  
32  
33  
34  
35  
36  
37  
38  
39  
40  
41  
42  
43  
44  
45  
46  
47  
48  
49  
50  
51  
52  
53  
54  
55  
56  
57  
58  
59  
60  
23, 25 The results indicated that lifetime medical expenditure was lower for smokers than  
for non-smokers, reflecting the 3.5-year shorter life expectancy of smokers.<sup>25</sup> On the  
other hand, lifetime medical expenditure was higher for participants who were obese  
( $BMI \geq 30.0$ ) than for those who had normal weight ( $18.5 \leq BMI < 25.0$ ), even though the  
former lived 2.0 years less than the latter.<sup>23</sup> In fact, both smokers and obese participants  
had shorter life expectancy than non-smokers and normal-weight participants, whereas  
their lifetime medical expenditure was conversely increased. These differences could be  
explained by the impact of these risk factors on quality of life. Using prospective data for  
16,176 adult Caucasians in the USA,<sup>32</sup> Reuser et al. estimated life expectancy and years  
of life with and without activities of daily living (ADL) disability in relation to smoking  
and BMI, respectively. The results indicated that smoking decreased both life expectancy  
and years of life with ADL disability, whereas obesity decreased the former but increased  
the latter, leading to their conclusion that “smoking kills, and obesity disables”. Reuser’s

1  
2  
3  
4  
5  
6  
7 conclusion is concordant with the impact of walking on life expectancy and lifetime  
8  
9 medical expenditure. Physical activity decreases not only mortality but also disability,  
10  
11 5-13, 17, 18, 33 leading to lower medical expenditure.<sup>34</sup> For instance, walking has been  
12  
13 significantly associated with a lower risk of cardiovascular disease,<sup>7</sup> stroke,<sup>35</sup> coronary  
14  
15 heart disease,<sup>36,37</sup> type 2 diabetes,<sup>38</sup> and hypertension.<sup>39</sup> Consequently, walking also  
16  
17 reduces expenditure on medication needed for these conditions.<sup>40</sup>  
18  
19  
20  
21  
22  
23  
24  
25

### 26 **Strengths and limitations**

27  
28  
29 This is the first study to have investigated the association between walking, life  
30  
31 expectancy, and lifetime medical expenditure. A major strength of this study was that we  
32  
33 collected individual data on medical expenditure based on a cohort study of survival and  
34  
35 medical care utilization, and its cost, for all participants,<sup>19, 22, 23, 25, 29</sup> and the NHI covers  
36  
37 almost all medical treatment in Japan. Second, we conducted a 13-year prospective  
38  
39 observation of 27,738 Japanese adults aged 40-79 years living in the community who  
40  
41 were free of any functional limitations or chronic conditions interfering with physical  
42  
43 activity, with an accrued total of 285,342 person-years. Third, in order to reduce bias or  
44  
45 reverse causation in that people did not walk because of functional limitations that also  
46  
47 required medical expenditure, we excluded participants who, at the baseline, reported  
48  
49 limited physical function or conditions interfering with physical activity. Additionally, to  
50  
51 control for confounders, we also included various covariates in our Poisson regression  
52  
53  
54  
55  
56  
57  
58  
59  
60

1  
2  
3  
4  
5  
6  
7 model and linear regression model.  
8

9  
10 On the other hand, several limitations should also be considered. First, we assessed  
11 walking using a simple questionnaire in which we asked the participants to report only the  
12 time spent walking and did not ask about walking pace, distance walked, or any  
13 distinction between walking for exercise and other reasons. Second, longer time spent  
14 walking may be a reflection of performing more vigorous activity, making it difficult to  
15 distinguish the impact of walking from other types of physical activity. However, the  
16 present result did not change after multivariate adjustment.  
17  
18  
19  
20  
21  
22  
23  
24  
25  
26  
27  
28  
29  
30  
31

### 32 **Conclusions and policy implication**

33  
34 In summary, lifetime medical expenditure was shown to be decreased in participants who  
35 walked  $\geq 1$  hour per day, despite the fact that they lived longer. Increased longevity  
36 resulting from a healthier lifestyle did not necessarily translate into an increased amount  
37 of medical expenditure throughout life. However, in present study, around 50 % of study  
38 participants walks  $< 1$  hour per day. To increase their walking time, recommendation of  
39 walking with pedometer may be useful.<sup>41</sup> An increase in walking time at the population  
40 level would bring about a tremendous change in people's health and medical cost. The  
41 campaign to encourage the people walk longer and program to make environment for  
42 people to walk more safely and pleasantly should be implemented. This intervention may  
43 extend life expectancy without apparently increasing lifetime medical expenditure,  
44  
45  
46  
47  
48  
49  
50  
51  
52  
53  
54  
55  
56  
57  
58  
59  
60



1  
2  
3  
4  
5  
6 especially men.  
7  
8  
9  
10  
11  
12  
13  
14  
15  
16  
17  
18  
19  
20  
21  
22  
23  
24  
25  
26  
27  
28  
29  
30  
31  
32  
33  
34  
35  
36  
37  
38  
39  
40  
41  
42  
43  
44  
45  
46  
47  
48  
49  
50  
51  
52  
53  
54  
55  
56  
57  
58  
59  
60

For peer review only

#### Article focus

- Medical expenditure per month was reduced when time spent walking was increased.
- Walking is associated with a decreased risk of mortality.
- In view of the increased life expectancy of those who walk longer, it is unclear whether

lifetime medical expenditure increases or decreases as a result.

### Key messages

- Lifetime medical expenditure from the age of 40 years for men and women who walked  $\geq 1$  hour per day was reduced by 7.6% and 2.7%, respectively, in comparison with those who walked  $< 1$  hour per day.
- Years of life added as a result of a healthy lifestyle did not necessarily translate into an increased amount of lifetime medical expenditure.

### Strengths and limitations of this study

- This is the first study to have investigated the association between walking, life expectancy, and lifetime medical expenditure.
- We assessed walking using a simple questionnaire in which we asked the participants to report only the time spent walking and did not ask about walking pace, distance walked, or any distinction between walking for exercise and other reasons.

### Contributions

All authors contributed to the design of the study. Masato Nagai, Shinichi Kuriyama, Masako Kakizaki, Kaori Ohmori-Matsuda, Toshimasa Sone, and Ichiro Tsuji participated in data collection. Masato Nagai, Shinichi Kuriyama, Atsushi Hozawa, Miyuki Kawado

1  
2  
3  
4  
5  
6 and Shuji Hashimoto participated in data analysis. Masato Nagai, Masako Kakizaki,  
7  
8  
9 Kaori Ohmori-Matsuda, Toshimasa Sone, Atsushi Hozawa, Miyuki Kawad, and Shuji  
10  
11 Hashimoto participated in the writing of the report. Shinichi Kuriyama and Ichiro Tsuji  
12  
13 participated in critical revision of the manuscript. All authors approved the final version  
14  
15 of the report for submission.  
16  
17  
18  
19  
20  
21  
22

### 23 **Funding**

24  
25  
26 This study was supported by a Health Sciences Research Grant for Health Services  
27  
28 (H21-Choju-Ippan-001, H20-Junkankitou (Seisyu)-Ippan-013, H22- Junkankitou  
29  
30 (Seisyu)-Ippan-012, H23- Junkankitou (Seisyu)-Ippan-005), Ministry of Health, Labour  
31  
32 and Welfare, Japan. Masato Nagai is a recipient of a Research Fellowships of the Japan  
33  
34 Society for the Promotion of Science for Young Scientists.  
35  
36  
37  
38  
39  
40  
41  
42

### 43 **Conflicts of Interest**

44  
45 The authors declare that they have no conflicts of interest.  
46  
47  
48  
49  
50  
51  
52

### 53 **Ethical approval**

54  
55 The study protocol was approved by the Ethics Committee of Tohoku University School  
56  
57 of Medicine. Participants who had returned the self-administered questionnaires and  
58  
59 signed them were considered to have consented to participate.  
60

## Data sharing

No additional data available.

## Figure legend

Figure 1

Multiadjusted mortality by time spent walking categories in each age-groups in men (a) and women (b).

## References

1. Franco OH, de Laet C, Peeters A, Jonker J, Mackenbach J, Nusselder W. Effects of physical activity on life expectancy with cardiovascular disease. *Arch Intern Med* 2005; 165: 2355-2360.

- 1  
2  
3  
4  
5  
6  
7  
8  
9  
10  
11  
12  
13  
14  
15  
16  
17  
18  
19  
20  
21  
22  
23  
24  
25  
26  
27  
28  
29  
30  
31  
32  
33  
34  
35  
36  
37  
38  
39  
40  
41  
42  
43  
44  
45  
46  
47  
48  
49  
50  
51  
52  
53  
54  
55  
56  
57  
58  
59  
60
2. Hatziandreu EI, Koplan JP, Weinstein MC, Caspersen CJ, Warner KE. A cost-effectiveness analysis of exercise as a health promotion activity. *Am J Public Health* 1988; 78: 1417-1421.
3. Jonker JT, De Laet C, Franco OH, Peeters A, Mackenbach J, Nusselder WJ. Physical activity and life expectancy with and without diabetes: life table analysis of the Framingham Heart Study. *Diabetes Care* 2006; 29: 38-43.
4. Keeler EB, Manning WG, Newhouse JP, Sloss EM, Wasserman J. The external costs of a sedentary life-style. *Am J Public Health* 1989; 79: 975-981.
5. Fujita K, Takahashi H, Miura C, et al. Walking and mortality in Japan: the Miyagi Cohort Study. *J Epidemiol* 2004; 14: S26-32.
6. Kujala UM, Kaprio J, Sarna S, Koskenvuo M. Relationship of leisure-time physical activity and mortality: the Finnish twin cohort. *JAMA* 1998; 279: 440-444.
7. LaCroix AZ, Leveille SG, Hecht JA, Grothaus LC, Wagner EH. Does walking decrease the risk of cardiovascular disease hospitalizations and death in older adults? *J Am Geriatr Soc* 1996; 44: 113-120.
8. Lee IM, Rexrode KM, Cook NR, Manson JE, Buring JE. Physical activity and coronary heart disease in women: is "no pain, no gain" passe? *JAMA* 2001; 285: 1447-1454.
9. Morioka S. [A cohort study on the relationship between lifestyles and total

- mortality]. *Nippon Koshu Eisei Zasshi* 1996; 43: 469-478.
10. Seki N. [Relationships between walking hours, sleeping hours, meaningfulness of life (ikigai) and mortality in the elderly: prospective cohort study]. *Nippon Eiseigaku Zasshi* 2001; 56: 535-540.
11. Stessman J, Maaravi Y, Hammerman-Rozenberg R, Cohen A. The effects of physical activity on mortality in the Jerusalem 70-Year-Olds Longitudinal Study. *J Am Geriatr Soc* 2000; 48: 499-504.
12. Wannamethee SG, Shaper AG, Walker M. Physical activity and mortality in older men with diagnosed coronary heart disease. *Circulation* 2000; 102: 1358-1363.
13. Weller I, Corey P. The impact of excluding non-leisure energy expenditure on the relation between physical activity and mortality in women. *Epidemiology* 1998; 9: 632-635.
14. Dumurgier J, Elbaz A, Ducimetiere P, Tavernier B, Alperovitch A, Tzourio C. Slow walking speed and cardiovascular death in well functioning older adults: prospective cohort study. *BMJ* 2009; 339: b4460.
15. Tanasescu M, Leitzmann MF, Rimm EB, Willett WC, Stampfer MJ, Hu FB. Exercise type and intensity in relation to coronary heart disease in men. *JAMA* 2002; 288: 1994-2000.
16. Cooper R, Kuh D, Hardy R. Objectively measured physical capability levels and mortality: systematic review and meta-analysis. *BMJ* 2010; 341: c4467.

- 1  
2  
3  
4  
5  
6  
7  
8  
9  
10  
11  
12  
13  
14  
15  
16  
17  
18  
19  
20  
21  
22  
23  
24  
25  
26  
27  
28  
29  
30  
31  
32  
33  
34  
35  
36  
37  
38  
39  
40  
41  
42  
43  
44  
45  
46  
47  
48  
49  
50  
51  
52  
53  
54  
55  
56  
57  
58  
59  
60
17. Hakim AA, Petrovitch H, Burchfiel CM, et al. Effects of walking on mortality among nonsmoking retired men. *N Engl J Med* 1998; 338: 94-99.
  18. Lee IM, Paffenbarger RS, Jr. Associations of light, moderate, and vigorous intensity physical activity with longevity. The Harvard Alumni Health Study. *Am J Epidemiol* 2000; 151: 293-299.
  19. Tsuji I, Takahashi K, Nishino Y, et al. Impact of walking upon medical care expenditure in Japan: the Ohsaki Cohort Study. *Int J Epidemiol* 2003; 32: 809-814.
  20. Jones TF, Eaton CB. Cost-benefit analysis of walking to prevent coronary heart disease. *Arch Fam Med* 1994; 3: 703-710.
  21. Perkins AJ, Clark DO. Assessing the association of walking with health services use and costs among socioeconomically disadvantaged older adults. *Prev Med* 2001; 32: 492-501.
  22. Tsuji I, Nishino Y, Ohkubo T, et al. A prospective cohort study on National Health Insurance beneficiaries in Ohsaki, Miyagi Prefecture, Japan: study design, profiles of the subjects and medical cost during the first year. *J Epidemiol* 1998; 8: 258-263.
  23. Nagai M, Kuriyama S, Kakizaki M, et al. Impact of Obesity, Overweight and Underweight on Life Expectancy and Lifetime Medical Expenditures. *Popul Health Metr*: under review.

- 1  
2  
3  
4  
5  
6  
7  
8  
9  
10  
11  
12  
13  
14  
15  
16  
17  
18  
19  
20  
21  
22  
23  
24  
25  
26  
27  
28  
29  
30  
31  
32  
33  
34  
35  
36  
37  
38  
39  
40  
41  
42  
43  
44  
45  
46  
47  
48  
49  
50  
51  
52  
53  
54  
55  
56  
57  
58  
59  
60
24. CL C. *The Life Table and Its Applications*: Krieger Publishing Company; 1983.
25. Hayashida K, Imanaka Y, Murakami G, et al. Difference in lifetime medical expenditures between male smokers and non-smokers. *Health Policy* 2010; 94: 84-89.
26. Kuriyama S, Shimazu T, Ohmori K, et al. Green tea consumption and mortality due to cardiovascular disease, cancer, and all causes in Japan: the Ohsaki study. *JAMA* 2006; 296: 1255-1265.
27. Stewart AL, Hays RD, Ware JE, Jr. The MOS short-form general health survey. Reliability and validity in a patient population. *Med Care* 1988; 26: 724-735.
28. Tsubono Y, Tsuji I, Fujita K, et al. Validation of walking questionnaire for population-based prospective studies in Japan: comparison with pedometer. *J Epidemiol* 2002; 12: 305-309.
29. Kuriyama S, Tsuji I, Ohkubo T, et al. Medical care expenditure associated with body mass index in Japan: the Ohsaki Study. *Int J Obes Relat Metab Disord* 2002; 26: 1069-1074.
30. Nakamura K, Okamura T, Kanda H, Hayakawa T, Okayama A, Ueshima H. Medical costs of obese Japanese: a 10-year follow-up study of National Health Insurance in Shiga, Japan. *Eur J Public Health* 2007; 17: 424-429.
31. Statistics and Information Department MsS MoH, Labour and Welfare, Japan. *The 20th Life Tables* 2000.



- 1  
2  
3  
4  
5  
6  
7  
8  
9  
10  
11  
12  
13  
14  
15  
16  
17  
18  
19  
20  
21  
22  
23  
24  
25  
26  
27  
28  
29  
30  
31  
32  
33  
34  
35  
36  
37  
38  
39  
40  
41  
42  
43  
44  
45  
46  
47  
48  
49  
50  
51  
52  
53  
54  
55  
56  
57  
58  
59  
60
32. Reuser M, Bonneux LG, Willekens FJ. Smoking kills, obesity disables: a multistate approach of the US Health and Retirement Survey. *Obesity (Silver Spring)* 2009; 17: 783-789.
33. Clark DO. The effect of walking on lower body disability among older blacks and whites. *Am J Public Health* 1996; 86: 57-61.
34. Mitra S, Findley PA, Sambamoorthi U. Health care expenditures of living with a disability: total expenditures, out-of-pocket expenses, and burden, 1996 to 2004. *Arch Phys Med Rehabil* 2009; 90: 1532-1540.
35. Hu FB, Stampfer MJ, Colditz GA, et al. Physical activity and risk of stroke in women. *JAMA* 2000; 283: 2961-2967.
36. Hakim AA, Curb JD, Petrovitch H, et al. Effects of walking on coronary heart disease in elderly men: the Honolulu Heart Program. *Circulation* 1999; 100: 9-13.
37. Manson JE, Hu FB, Rich-Edwards JW, et al. A prospective study of walking as compared with vigorous exercise in the prevention of coronary heart disease in women. *N Engl J Med* 1999; 341: 650-658.
38. Hu FB, Sigal RJ, Rich-Edwards JW, et al. Walking compared with vigorous physical activity and risk of type 2 diabetes in women: a prospective study. *JAMA* 1999; 282: 1433-1439.
39. Hayashi T, Tsumura K, Suematsu C, Okada K, Fujii S, Endo G. Walking to work and the risk for hypertension in men: the Osaka Health Survey. *Ann Intern Med*

1  
2  
3  
4  
5  
6  
7 1999; 131: 21-26.  
8

9  
10 **40.** Williams PT. Reduced diabetic, hypertensive, and cholesterol medication use with  
11 walking. *Med Sci Sports Exerc* 2008; 40: 433-443.  
12  
13

14  
15 **41.** Snyder A, Colvin B, Gammack JK. Pedometer Use Increases Daily Steps and  
16 Functional Status in Older Adults. *J Am Med Dir Assoc* 2010; Epub ahead of  
17 print.  
18  
19  
20  
21  
22  
23  
24  
25  
26  
27  
28  
29  
30  
31  
32  
33  
34  
35  
36  
37  
38  
39  
40  
41  
42  
43  
44  
45  
46  
47  
48  
49  
50  
51  
52  
53  
54  
55  
56  
57  
58  
59  
60

Table 1. Baseline characteristics by time spent walking categories in 27,738 participants.

|                                  | Men                |         |                             | Women              |         |                             |
|----------------------------------|--------------------|---------|-----------------------------|--------------------|---------|-----------------------------|
|                                  | Time spent walking |         | <i>p</i> value <sup>†</sup> | Time spent walking |         | <i>p</i> value <sup>†</sup> |
|                                  | <1 hour            | ≥1 hour |                             | <1 hour            | ≥1 hour |                             |
| No. of subjects                  | 7,363              | 8,158   |                             | 6,303              | 5,914   |                             |
| Mean age                         | 57.4               | 57.2    | 0.2784                      | 57.9               | 57.6    | 0.0714                      |
| (Standard deviation)             | (10.6)             | (10.2)  |                             | (10.1)             | (9.7)   |                             |
| Smoking status (%)               |                    |         |                             |                    |         |                             |
| Current and Past smoker          | 81.9               | 79.8    | 0.0011                      | 12.6               | 9.9     | <0.0001                     |
| Never smoker                     | 18.1               | 20.2    |                             | 87.5               | 90.1    |                             |
| Alcohol drinking (%)             |                    |         |                             |                    |         |                             |
| Never and past drinker           | 26.5               | 25.1    | 0.1117                      | 74.7               | 75.4    | 0.1380                      |
| Current drinker, 1-449 g/week    | 61.3               | 62.2    |                             | 24.3               | 23.9    |                             |
| Current drinker, ≥450 g/week     | 12.2               | 12.8    |                             | 1.1                | 0.7     |                             |
| Body mass index (%)              |                    |         |                             |                    |         |                             |
| <21 kg/m <sup>2</sup>            | 18.5               | 20.5    | <0.0001                     | 18.6               | 19.4    | 0.0019                      |
| 21-24.9 kg/m <sup>2</sup>        | 53.3               | 55.8    |                             | 50.7               | 52.9    |                             |
| ≥25 kg/m <sup>2</sup>            | 28.3               | 23.7    |                             | 30.7               | 27.7    |                             |
| Self-rated health (%)            |                    |         |                             |                    |         |                             |
| Good                             | 73.1               | 79.3    | <0.0001                     | 72.5               | 78.2    | <0.0001                     |
| Not good                         | 26.9               | 20.7    |                             | 27.5               | 21.8    |                             |
| Sports and physical activity (%) |                    |         |                             |                    |         |                             |
| ≥3 hours/week                    | 13.2               | 18.7    | <0.0001                     | 10.7               | 16.6    | <0.0001                     |
| <3 hours/week                    | 86.8               | 81.3    |                             | 89.3               | 83.4    |                             |
| History of hypertension (%)      |                    |         |                             |                    |         |                             |
| Presence                         | 21.5               | 18.6    | <0.0001                     | 24.2               | 20.1    | <0.0001                     |
| Absence                          | 78.5               | 81.4    |                             | 75.8               | 79.9    |                             |
| History of diabetes mellitus (%) |                    |         |                             |                    |         |                             |
| Presence                         | 7.4                | 4.8     | <0.0001                     | 5.1                | 3.2     | <0.0001                     |
| Absence                          | 92.6               | 95.2    |                             | 94.9               | 96.8    |                             |
| History of cancer (%)            |                    |         |                             |                    |         |                             |
| Presence                         | 2.1                | 1.8     | 0.2563                      | 2.8                | 2.8     | 0.9032                      |
| Absence                          | 97.9               | 98.2    |                             | 97.2               | 97.2    |                             |
| History of liver disease (%)     |                    |         |                             |                    |         |                             |
| Presence                         | 6.9                | 5.7     | 0.0013                      | 3.7                | 2.9     | 0.0223                      |
| Absence                          | 93.1               | 94.4    |                             | 96.3               | 97.1    |                             |
| History of kidney disease (%)    |                    |         |                             |                    |         |                             |
| Presence                         | 2.9                | 2.7     | 0.3493                      | 3.6                | 2.7     | 0.0049                      |
| Absence                          | 97.1               | 97.3    |                             | 96.4               | 97.3    |                             |

<sup>†</sup> *p* values were calculated by t-test or chi-squared test.

1  
2  
3  
4  
5  
6  
7  
8  
9  
10  
11  
12  
13  
14  
15  
16  
17  
18  
19  
20  
21  
22  
23  
24  
25  
26  
27  
28  
29  
30  
31  
32  
33  
34  
35  
36  
37  
38  
39  
40  
41  
42  
43  
44  
45  
46  
47  
48  
49  
50  
51  
52  
53  
54  
55  
56  
57  
58  
59  
60

For peer review only

Table 2. Mortality ratio for time spent walking categories in 27,738 participants.

|       | Time spent walking | Univariate      |                         |                | Multiadjusted <sup>†</sup> |                         |                |
|-------|--------------------|-----------------|-------------------------|----------------|----------------------------|-------------------------|----------------|
|       |                    | Mortality ratio | 95% confidence interval | <i>p</i> value | Mortality ratio            | 95% confidence interval | <i>p</i> value |
| Men   | <1 hour            | 1.00            |                         |                | 1.00                       |                         |                |
|       | ≥1 hour            | 0.87            | 0.80 - 0.94             | 0.0009         | 0.90                       | 0.82 - 0.98             | 0.0153         |
| Women | <1 hour            | 1.00            |                         |                | 1.00                       |                         |                |
|       | ≥1 hour            | 0.89            | 0.77 - 1.03             | 0.1135         | 0.95                       | 0.82 - 1.10             | 0.4693         |

<sup>†</sup> Adjusted for age groups, smoking status, alcohol drinking, body mass index, self-rated health, sports and physical activity, and history of hypertension disease, diabetes mellitus, cancer, liver disease and kidney disease.

Table 3. Life expectancy and lifetime medical expenditure at age 40 years for time spent walking categories in 27,738 participants.

|       | Time spent walking                               | Univariate |                         |                | Multiadjusted <sup>†</sup> |                         |                |
|-------|--------------------------------------------------|------------|-------------------------|----------------|----------------------------|-------------------------|----------------|
|       |                                                  | Estimate   | 95% confidence interval | <i>p</i> value | Estimate                   | 95% confidence interval | <i>p</i> value |
| Men   | Life expectancy at age 40 years (years)          |            |                         |                |                            |                         |                |
|       | <1 hour                                          | 42.41      | 41.45 - 43.26           |                | 43.43                      | 42.39 - 44.41           |                |
|       | ≥1 hour                                          | 44.19      | 43.15 - 45.19           | 0.0004         | 44.81                      | 43.66 - 45.94           | 0.0073         |
|       | Lifetime medical expenditure at age 40 years (£) |            |                         |                |                            |                         |                |
|       | <1 hour                                          | 107,023.2  | 101,093.6 - 113,066.3   |                | 107,544.2                  | 101,234.0 - 114,044.6   |                |
|       | ≥1 hour                                          | 94,402.1   | 87,812.3 - 101,248.0    | <0.0001        | 99,423.6                   | 92,515.9 - 106,694.7    | 0.0048         |
| Women | Life expectancy at age 40 years (years)          |            |                         |                |                            |                         |                |
|       | <1 hour                                          | 52.25      | 49.79 - 54.92           |                | 56.62                      | 53.17 - 60.62           | 0.2351         |
|       | ≥1 hour                                          | 54.25      | 51.38 - 57.48           | 0.0569         | 57.78                      | 54.02 - 62.22           |                |
|       | Lifetime medical expenditure at age 40 years (£) |            |                         |                |                            |                         |                |
|       | <1 hour                                          | 123,553.0  | 111,619.5 - 137,549.6   |                | 131,766.8                  | 115,902.4 - 150,714.3   |                |
|       | ≥1 hour                                          | 115,896.0  | 102,406.6 - 131,792.1   | 0.0644         | 128,161.2                  | 111,335.0 - 148,494.7   | 0.2559         |

<sup>†</sup> Adjusted for age groups, smoking status, alcohol drinking, body mass index, self-rated health, sports and physical activity, and history of hypertension disease, diabetes mellitus, cancer, liver disease and kidney disease.

only

1  
2  
3  
4  
5  
6  
7  
8  
9  
10  
11  
12  
13  
14  
15  
16  
17  
18  
19  
20  
21  
22  
23  
24  
25  
26  
27  
28  
29  
30  
31  
32  
33  
34  
35  
36  
37  
38  
39  
40  
41  
42  
43  
44  
45  
46  
47  
48  
49  
50  
51  
52  
53  
54  
55  
56  
57  
58  
59  
60

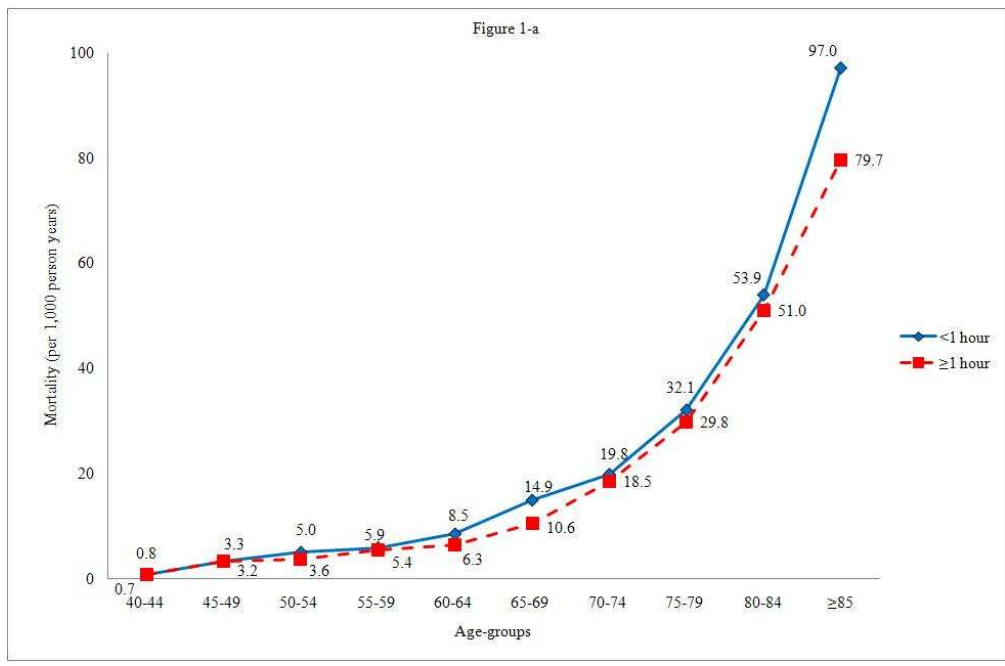

82x54mm (300 x 300 DPI)

Review only

1  
2  
3  
4  
5  
6  
7  
8  
9  
10  
11  
12  
13  
14  
15  
16  
17  
18  
19  
20  
21  
22  
23  
24  
25  
26  
27  
28  
29  
30  
31  
32  
33  
34  
35  
36  
37  
38  
39  
40  
41  
42  
43  
44  
45  
46  
47  
48  
49  
50  
51  
52  
53  
54  
55  
56  
57  
58  
59  
60

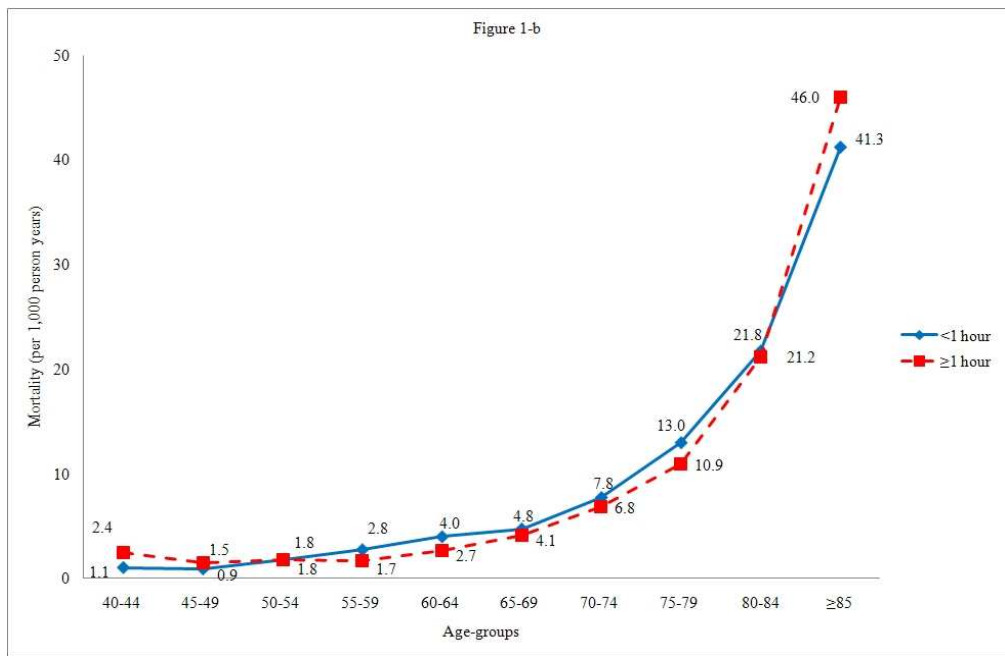

82x54mm (300 x 300 DPI)

Review only



STROBE 2007 (v4) Statement—Checklist of items that should be included in reports of *cohort studies*

| Section/Topic                | Item # | Recommendation                                                                                                                                                                       | Reported on page # |
|------------------------------|--------|--------------------------------------------------------------------------------------------------------------------------------------------------------------------------------------|--------------------|
| Title and abstract           | 1      | (a) Indicate the study's design with a commonly used term in the title or the abstract                                                                                               | p. 1, 3            |
|                              |        | (b) Provide in the abstract an informative and balanced summary of what was done and what was found                                                                                  | p. 3, 4            |
| <b>Introduction</b>          |        |                                                                                                                                                                                      |                    |
| Background/rationale         | 2      | Explain the scientific background and rationale for the investigation being reported                                                                                                 | p. 5               |
| Objectives                   | 3      | State specific objectives, including any prespecified hypotheses                                                                                                                     | p. 5, 6            |
| <b>Methods</b>               |        |                                                                                                                                                                                      |                    |
| Study design                 | 4      | Present key elements of study design early in the paper                                                                                                                              | p. 6               |
| Setting                      | 5      | Describe the setting, locations, and relevant dates, including periods of recruitment, exposure, follow-up, and data collection                                                      | p. 7-9             |
| Participants                 | 6      | (a) Give the eligibility criteria, and the sources and methods of selection of participants. Describe methods of follow-up                                                           | p. 7-8             |
|                              |        | (b) For matched studies, give matching criteria and number of exposed and unexposed                                                                                                  |                    |
| Variables                    | 7      | Clearly define all outcomes, exposures, predictors, potential confounders, and effect modifiers. Give diagnostic criteria, if applicable                                             | p. 8-11            |
| Data sources/<br>measurement | 8*     | For each variable of interest, give sources of data and details of methods of assessment (measurement). Describe comparability of assessment methods if there is more than one group | p. 8-11            |
| Bias                         | 9      | Describe any efforts to address potential sources of bias                                                                                                                            | p. 10              |
| Study size                   | 10     | Explain how the study size was arrived at                                                                                                                                            | p. 8               |
| Quantitative variables       | 11     | Explain how quantitative variables were handled in the analyses. If applicable, describe which groupings were chosen and why                                                         | p. 10              |
| Statistical methods          | 12     | (a) Describe all statistical methods, including those used to control for confounding                                                                                                | p. 9-11            |
|                              |        | (b) Describe any methods used to examine subgroups and interactions                                                                                                                  | -                  |
|                              |        | (c) Explain how missing data were addressed                                                                                                                                          | -                  |
|                              |        | (d) If applicable, explain how loss to follow-up was addressed                                                                                                                       | p. 8, 9            |
|                              |        | (e) Describe any sensitivity analyses                                                                                                                                                | p. 9-11-           |
| <b>Results</b>               |        |                                                                                                                                                                                      |                    |

|                          |     |                                                                                                                                                                                                              |           |
|--------------------------|-----|--------------------------------------------------------------------------------------------------------------------------------------------------------------------------------------------------------------|-----------|
| Participants             | 13* | (a) Report numbers of individuals at each stage of study—eg numbers potentially eligible, examined for eligibility, confirmed eligible, included in the study, completing follow-up, and analysed            | p. 7, 8   |
|                          |     | (b) Give reasons for non-participation at each stage                                                                                                                                                         | p. 7, 8   |
|                          |     | (c) Consider use of a flow diagram                                                                                                                                                                           | -         |
| Descriptive data         | 14* | (a) Give characteristics of study participants (eg demographic, clinical, social) and information on exposures and potential confounders                                                                     | p. 12     |
|                          |     | (b) Indicate number of participants with missing data for each variable of interest                                                                                                                          | -         |
|                          |     | (c) Summarise follow-up time (eg, average and total amount)                                                                                                                                                  | p. 12     |
| Outcome data             | 15* | Report numbers of outcome events or summary measures over time                                                                                                                                               | -         |
| Main results             | 16  | (a) Give unadjusted estimates and, if applicable, confounder-adjusted estimates and their precision (eg, 95% confidence interval). Make clear which confounders were adjusted for and why they were included | p. 13, 14 |
|                          |     | (b) Report category boundaries when continuous variables were categorized                                                                                                                                    | p. 8, 10  |
|                          |     | (c) If relevant, consider translating estimates of relative risk into absolute risk for a meaningful time period                                                                                             | -         |
| Other analyses           | 17  | Report other analyses done—eg analyses of subgroups and interactions, and sensitivity analyses                                                                                                               | -         |
| <b>Discussion</b>        |     |                                                                                                                                                                                                              |           |
| Key results              | 18  | Summarise key results with reference to study objectives                                                                                                                                                     | p. 15     |
| <b>Limitations</b>       |     |                                                                                                                                                                                                              |           |
| Interpretation           | 20  | Give a cautious overall interpretation of results considering objectives, limitations, multiplicity of analyses, results from similar studies, and other relevant evidence                                   | p. 15-18  |
| Generalisability         | 21  | Discuss the generalisability (external validity) of the study results                                                                                                                                        | p. 17     |
| <b>Other information</b> |     |                                                                                                                                                                                                              |           |
| Funding                  | 22  | Give the source of funding and the role of the funders for the present study and, if applicable, for the original study on which the present article is based                                                | p. 20     |

\*Give information separately for cases and controls in case-control studies and, if applicable, for exposed and unexposed groups in cohort and cross-sectional studies.

**Note:** An Explanation and Elaboration article discusses each checklist item and gives methodological background and published examples of transparent reporting. The STROBE checklist is best used in conjunction with this article (freely available on the Web sites of PLoS Medicine at <http://www.plosmedicine.org/>, Annals of Internal Medicine at <http://www.annals.org/>, and Epidemiology at <http://www.epidem.com/>). Information on the STROBE Initiative is available at [www.strobe-statement.org](http://www.strobe-statement.org).
